# Supplementary material for: Ubiquitousness of Haloferax and Carotenoid Producing Genes in Arabian Sea Coastal Biosystems of India
Source: MDPI journal article supplement (doi:10.3390/md19080442), 2021-07-31
Supplement: s1 [file s1]

# Supplementary Information

## Ubiquitousness of *Haloferax* and Carotenoid Producing Genes in Arabian Sea Coastal Biosystems of India

Jamseel Moopantakath<sup>1</sup>, Madangchanok Imchen<sup>1</sup>, Ranjith Kumavath<sup>\*1</sup> and Rosa María Martínez-Espinosa<sup>2,3</sup>

<sup>1</sup>Department of Genomic Science, School of Biological Sciences, Central University of Kerala, Tejaswini Hills, Periya (PO) Kasaragod, Kerala 671320, India.

<sup>2</sup>Biochemistry and Molecular Biology Division, Agrochemistry and Biochemistry Department, Faculty of Sciences, University of Alicante, Ap. 99, E-03080 Alicante, Spain

<sup>3</sup>Multidisciplinary Institute for Environmental Studies “Ramón Margalef” University of Alicante, Ap. 99, E-03080 Alicante, Spain

\* Correspondence: Dr. Ranjith Kumavath, Ph.D., FRSB,  
Email: RNKumavath@gmail.com; RNKumavath@cukerala.ac.in, Tel. No. +91-8547648620

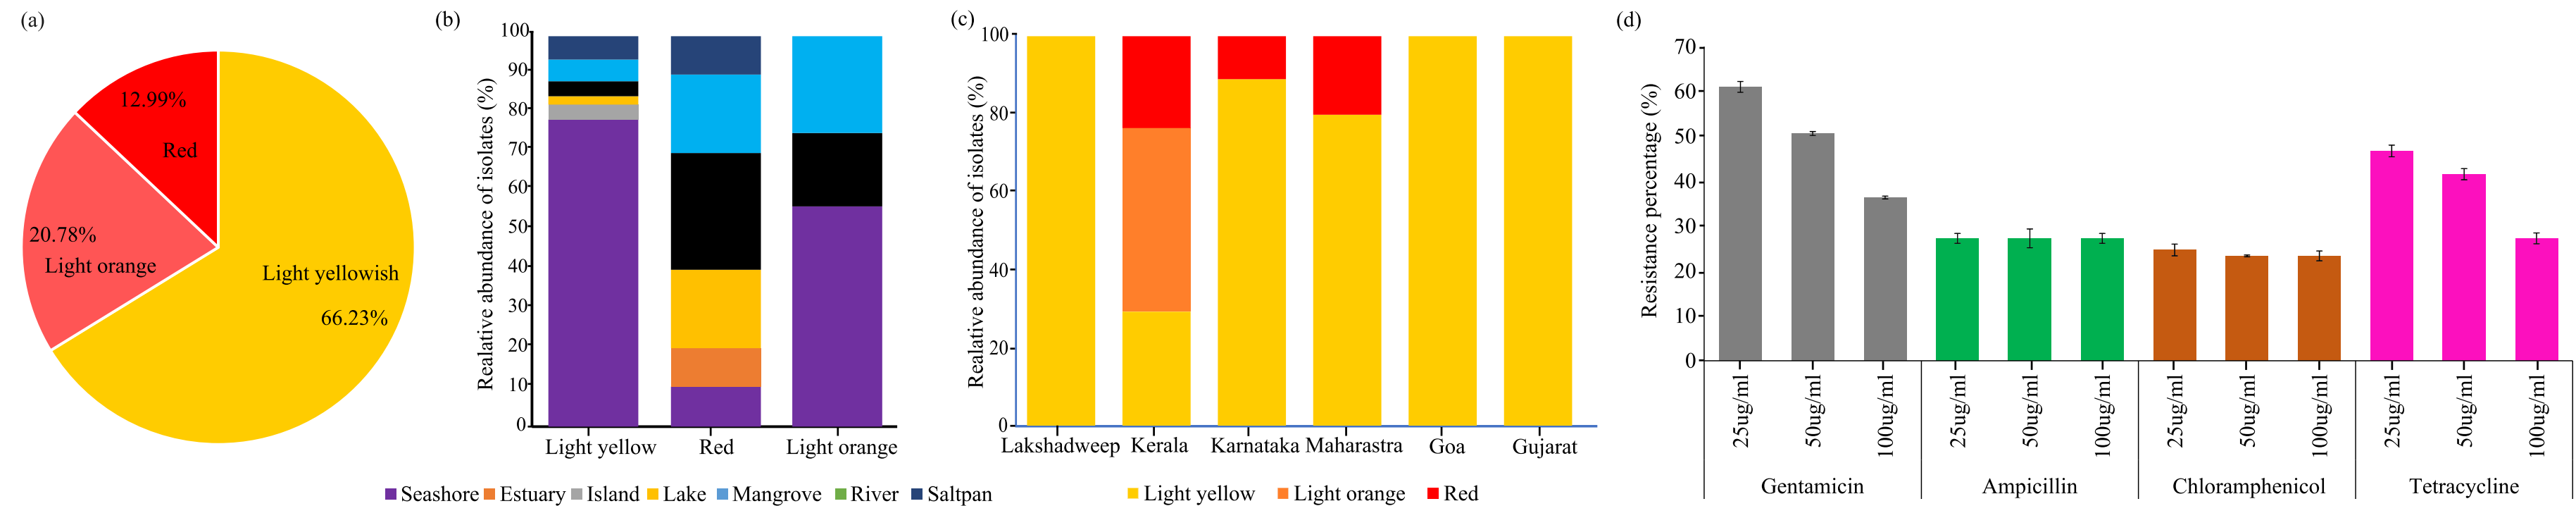

**Figure S1:** Pigmentation in the extreme halophiles grouped according to (a) pigmentation color, (b) biosystems, and (c) geography. (d) Antibiotic resistance profiles of the halotolerant isolates.

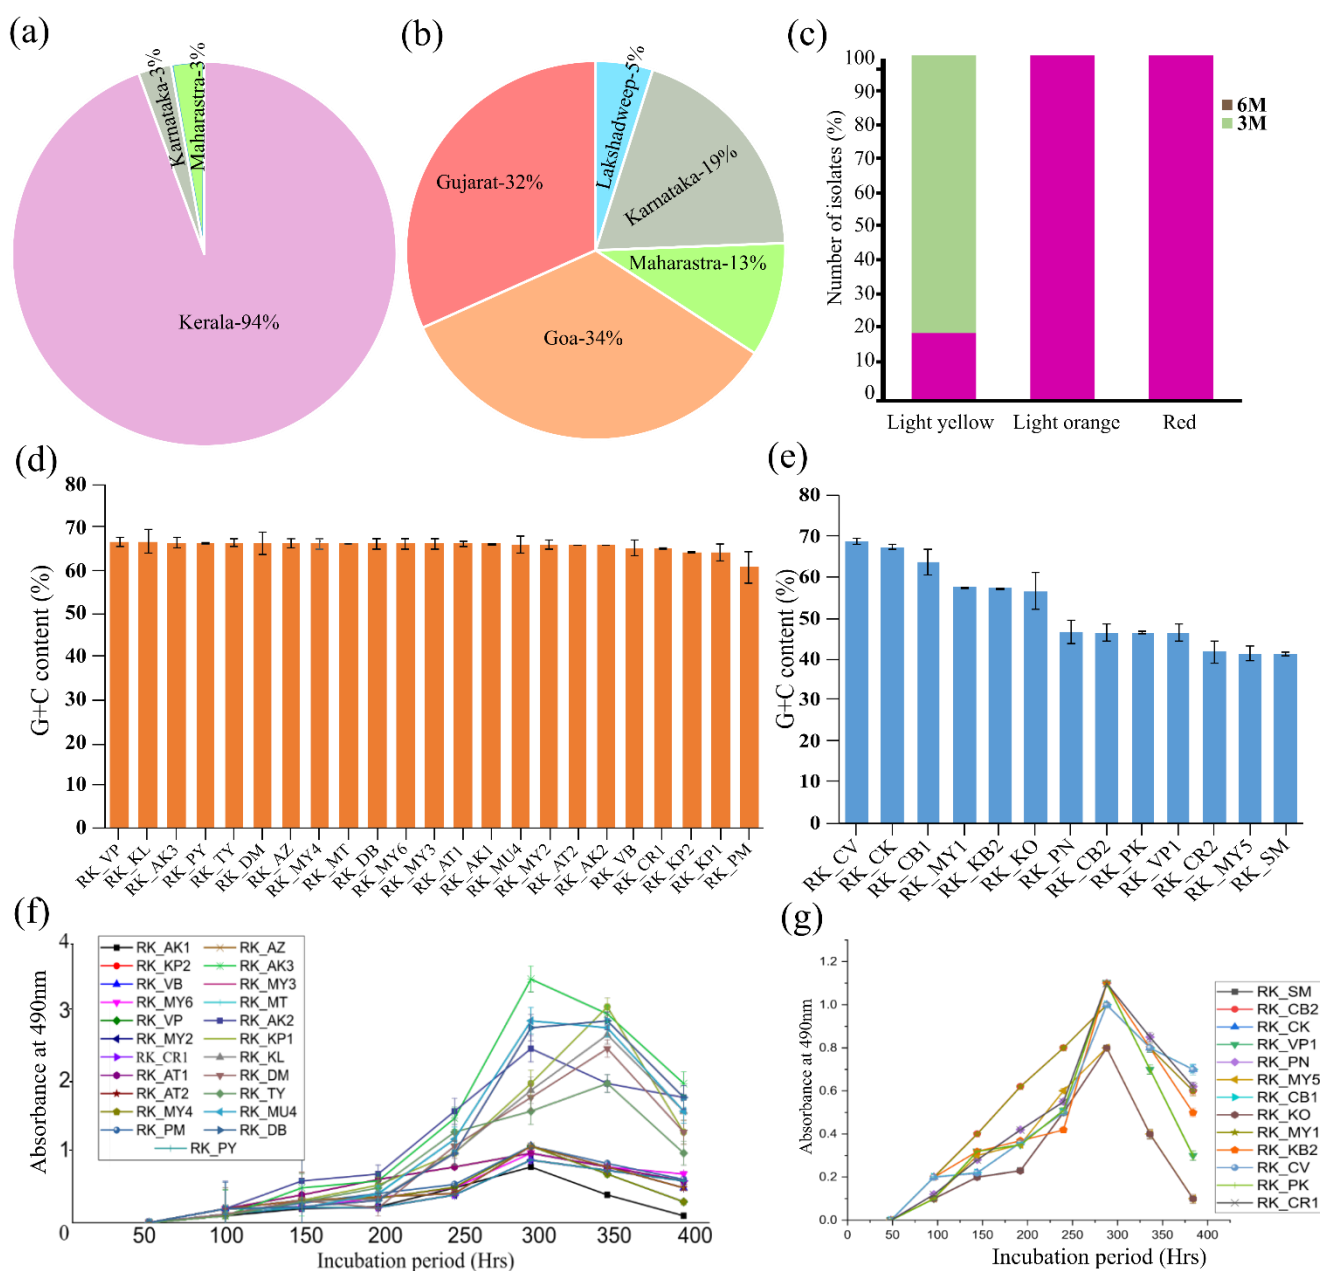

**Figure S2:** Distribution of halophilic isolates resistant to (a) 6M and (b) 3M NaCl enforced in MSG media. (c) 3M and 6M NaCl resistance isolated based on pigmentation. Yellow pigmented isolates were resistant only up to 3M NaCl. The G+C content of extreme halotolerant (d) archaea and (e) bacteria. Pigmentation production at various time points in 6M NaCl by halophilic (f) archaeal and (g) bacterial isolates.

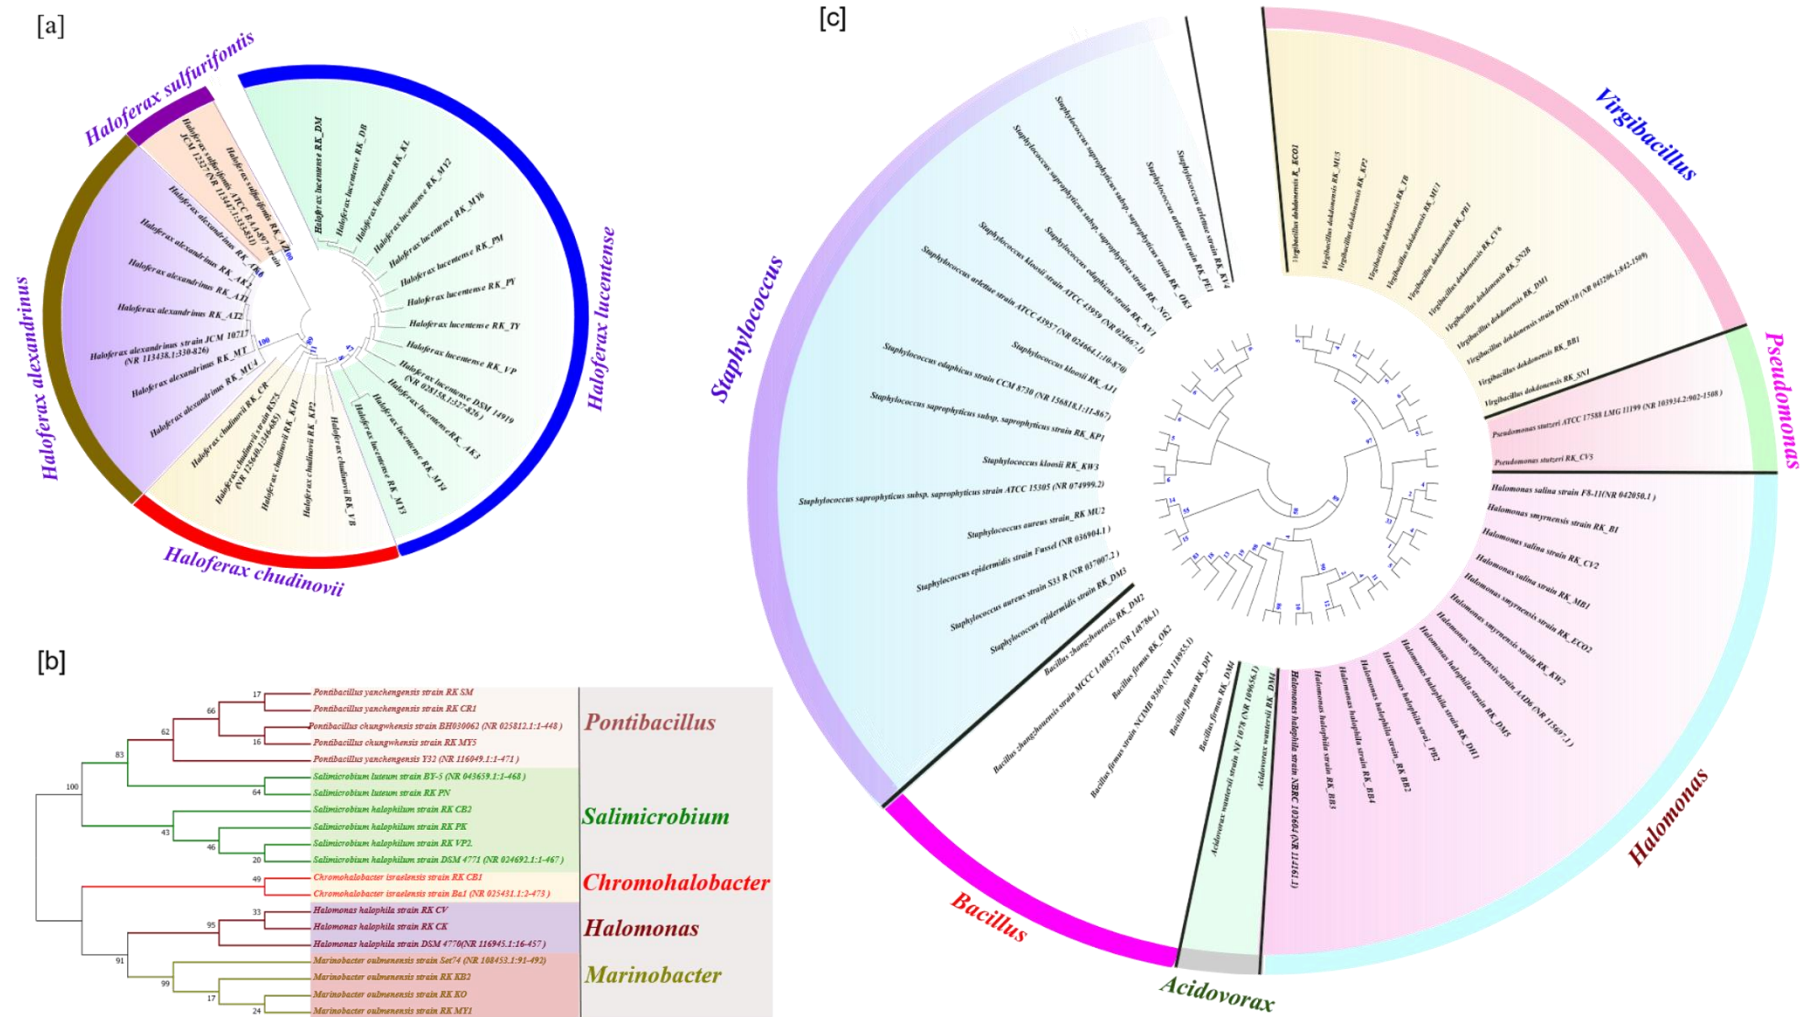

**Figure S3:** Phylogenetic tree, constructed using the neighbor-joining method, of halophilic (a) archaea and (b) bacteria isolated from Kerala coastal region, (c) bacterial halophiles from Gujarat, Maharashtra, Goa, Karnataka, and Lakshadweep coastal regions.

**Table S1: Gram nature, motility, aerobic and pH parameters of the isolated halophiles.**

| S.No | Location    | Name of the isolates | Gram nature      | Motility   | Anaerobic/Aerobic   | Optimum pH |
|------|-------------|----------------------|------------------|------------|---------------------|------------|
| 1    | Kerala      | RK_AK1               | +Ve rods         | Motile     | Anaerobic & Aerobic | 7-8        |
| 2    | Kerala      | RK_AK2               | +Ve cocci        | Motile     | Anaerobic & Aerobic | 7-8        |
| 3    | Kerala      | RK_AK3               | +Ve cocci        | Motile     | Anaerobic & Aerobic | 7-8        |
| 4    | Kerala      | RK_AT1               | -Ve irregular    | Motile     | Anaerobic & Aerobic | 7-8        |
| 5    | Kerala      | RK_AT2               | +Ve rods         | Motile     | Anaerobic & Aerobic | 7-8        |
| 6    | Kerala      | RK_AZ                | +Ve coccobacilli | Motile     | Anaerobic & Aerobic | 7-8        |
| 7    | Kerala      | RK_CR                | -Ve rods         | Motile     | Anaerobic & Aerobic | 7-8        |
| 8    | Kerala      | RK_DM                | -Ve cocci        | Motile     | Anaerobic & Aerobic | 7-8        |
| 9    | Kerala      | RK_KL                | +Ve cocci        | Motile     | Anaerobic & Aerobic | 7-8        |
| 10   | Kerala      | RK_KP1               | +Ve cocci        | Motile     | Anaerobic & Aerobic | 7-8        |
| 11   | Kerala      | RK_KP2               | +Ve rods         | Motile     | Anaerobic & Aerobic | 7-8        |
| 12   | Kerala      | RK_MT                | +Ve cocci        | Motile     | Anaerobic & Aerobic | 7-8        |
| 13   | Kerala      | RK_MY2               | -Ve rods         | Motile     | Anaerobic & Aerobic | 7-8        |
| 14   | Kerala      | RK_MY3               | +Ve cocci        | Motile     | Anaerobic & Aerobic | 7-8        |
| 15   | Kerala      | RK_MY4               | -Ve rods         | Motile     | Anaerobic & Aerobic | 7-8        |
| 16   | Kerala      | RK_MY6               | +Ve rods         | Motile     | Anaerobic & Aerobic | 7-8        |
| 17   | Kerala      | RK_PM                | +Ve rods         | Motile     | Anaerobic & Aerobic | 7-8        |
| 18   | Kerala      | RK_PY                | +Ve rods         | Motile     | Anaerobic & Aerobic | 7-8        |
| 19   | Kerala      | RK_TY                | +Ve cocci        | Motile     | Anaerobic & Aerobic | 7-8        |
| 20   | Kerala      | RK_VB                | -Ve rods         | Motile     | Anaerobic & Aerobic | 7-8        |
| 21   | Kerala      | RK_VP                | +Ve cocci        | Motile     | Anaerobic & Aerobic | 7-8        |
| 22   | Kerala      | RK_CB1               | -Ve rod          | Motile     | Anaerobic & Aerobic | 7-8        |
| 23   | Kerala      | RK_CB2               | +Ve cocci        | Non Motile | Anaerobic & Aerobic | 7-8        |
| 24   | Kerala      | RK_CK                | -Ve rod          | Motile     | Anaerobic & Aerobic | 7-8        |
| 25   | Kerala      | RK_CR1               | +Ve rod          | Motile     | Anaerobic & Aerobic | 7-8        |
| 26   | Kerala      | RK_CV                | -Ve rod          | Motile     | Anaerobic & Aerobic | 7-8        |
| 27   | Kerala      | RK_KB2               | -Ve rod          | Motile     | Anaerobic & Aerobic | 7-8        |
| 28   | Kerala      | RK_KO                | -Ve rod          | Motile     | Anaerobic & Aerobic | 7-8        |
| 29   | Kerala      | RK_MY1               | -Ve rod          | Motile     | Anaerobic & Aerobic | 7-8        |
| 30   | Kerala      | RK_MY5               | +Ve rod          | Non Motile | Anaerobic & Aerobic | 7-8        |
| 31   | Kerala      | RK_PK                | +Ve cocci        | Non Motile | Anaerobic & Aerobic | 7-8        |
| 32   | Kerala      | RK_PN                | +Ve cocci        | Non Motile | Anaerobic & Aerobic | 7-8        |
| 33   | Kerala      | RK_SM                | +Ve rod          | Motile     | Anaerobic & Aerobic | 7-8        |
| 34   | Kerala      | RK_VP1               | +Ve cocci        | Non Motile | Anaerobic & Aerobic | 7-8        |
| 35   | Gujarat     | RK_DM1               | +Ve rod          | Motile     | Aerobic             | 7-8        |
| 36   | Gujarat     | RK_DM2               | +Ve rod          | Motile     | Aerobic             | 7-8        |
| 37   | Gujarat     | RK_DM3               | +Ve cocci        | Non Motile | Aerobic             | 7-8        |
| 38   | Gujarat     | RK_DM4               | -Ve rod          | Motile     | Aerobic             | 7-8        |
| 39   | Gujarat     | RK_DM5               | -Ve rod          | Motile     | Aerobic             | 7-8        |
| 40   | Gujarat     | RK_NG1               | +Ve cocci        | Non Motile | Aerobic             | 7-8        |
| 41   | Gujarat     | RK_OK1               | +Ve rod          | Motile     | Aerobic             | 7-8        |
| 42   | Gujarat     | RK_OK2               | +Ve rod          | Motile     | Aerobic             | 7-8        |
| 43   | Gujarat     | RK_OK3               | +Ve cocci        | Non Motile | Aerobic             | 7-8        |
| 44   | Gujarat     | RK_PB1               | +Ve rod          | Motile     | Aerobic             | 7-8        |
| 45   | Gujarat     | RK_PB2               | -Ve rod          | Motile     | Aerobic             | 7-8        |
| 46   | Gujarat     | RK_SN1               | +Ve rod          | Motile     | Aerobic             | 7-8        |
| 47   | Gujarat     | RK_SN2               | +Ve rod          | Motile     | Aerobic             | 7-8        |
| 48   | Goa         | RK_AJ1               | +Ve cocci        | Non Motile | Aerobic             | 7-8        |
| 49   | Goa         | RK_BB1               | +Ve rod          | Motile     | Aerobic             | 7-8        |
| 50   | Goa         | RK_BB2               | -Ve rod          | Motile     | Aerobic             | 7-8        |
| 51   | Goa         | RK_BB3               | -Ve rod          | Motile     | Aerobic             | 7-8        |
| 52   | Goa         | RK_BB4               | -Ve rod          | Motile     | Aerobic             | 7-8        |
| 53   | Goa         | RK_CV1               | +Ve cocci        | Non Motile | Aerobic             | 7-8        |
| 54   | Goa         | RK_CV2               | -Ve rod          | Motile     | Aerobic             | 7-8        |
| 55   | Goa         | RK_CV3               | +Ve rod          | Motile     | Aerobic             | 7-8        |
| 56   | Goa         | RK_CV4               | +Ve cocci        | Non Motile | Aerobic             | 7-8        |
| 57   | Goa         | RK_CV5               | -Ve rod          | Motile     | Aerobic             | 7-8        |
| 58   | Goa         | RK_CV6               | +Ve rod          | Motile     | Aerobic             | 7-8        |
| 59   | Goa         | RK_DH1               | -Ve rod          | Motile     | Aerobic             | 7-8        |
| 60   | Goa         | RK_MB1               | -Ve rod          | Motile     | Aerobic             | 7-8        |
| 61   | Goa         | RK_PE1               | +Ve cocci        | Non Motile | Aerobic             | 7-8        |
| 62   | Maharashtra | RK_DP1               | +Ve rod          | Motile     | Aerobic             | 7-8        |
| 63   | Maharashtra | RK_MU1               | +Ve rod          | Motile     | Aerobic             | 7-8        |
| 64   | Maharashtra | RK_MU2               | +Ve cocci        | Non Motile | Aerobic             | 7-8        |
| 65   | Maharashtra | RK_MU4               | +Ve cocci        | Motile     | Anaerobic & Aerobic | 7-8        |
| 66   | Maharashtra | RK_MU5               | +Ve rod          | Motile     | Aerobic             | 7-8        |
| 67   | Karnataka   | RK_DB                | +Ve cocci        | Non Motile | Anaerobic & Aerobic | 7-8        |
| 68   | Karnataka   | RK_ECO1              | +Ve rod          | Motile     | Aerobic             | 7-8        |
| 69   | Karnataka   | RK_ECO2              | -Ve rod          | Motile     | Aerobic             | 7-8        |
| 70   | Karnataka   | RK_KU1               | +Ve cocci        | Non Motile | Aerobic             | 7-8        |
| 71   | Karnataka   | RK_KU2               | +Ve rod          | Motile     | Aerobic             | 7-8        |
| 72   | Karnataka   | RK_KW1               | -Ve rod          | Motile     | Aerobic             | 7-8        |
| 73   | Karnataka   | RK_KW2               | -Ve rod          | Motile     | Aerobic             | 7-8        |
| 74   | Karnataka   | RK_KW3               | +Ve cocci        | Non Motile | Aerobic             | 7-8        |
| 75   | Karnataka   | RK_TB                | +Ve rod          | Motile     | Aerobic             | 7-8        |
| 76   | Lakshadweep | RK_AI                | +Ve cocci        | Non Motile | Aerobic             | 7-8        |
| 77   | Lakshadweep | RK_BI                | -Ve rod          | Motile     | Aerobic             | 7-8        |



Table S3: 16s rRNA gene sequence similarity of halotolerant microbial isolates with location and accession number

| Sequence ID | Location                                     | Accession number | Closest taxon                                                                     | 16S rRNA gene similarity (%) |
|-------------|----------------------------------------------|------------------|-----------------------------------------------------------------------------------|------------------------------|
| RK_AI       | Agatti island, Lakshadweep                   | MT322528         | <i>Staphylococcus arlettae</i> strain ATCC 43957                                  | 99.88                        |
| RK_AJ       | Anjuna beach, Goa                            | MT322493         | <i>Staphylococcus kloosii</i> strain ATCC 43959                                   | 99.74                        |
| RK_AT1      | Anjuthengu beach, Thiruvananthapuram, Kerala | MT322460         | <i>Haloferax alexandrinus</i> strain JCM 10717                                    | 99.80                        |
| RK_AT2      | Anjuthengu beach, Thiruvananthapuram, Kerala | MT322461         | <i>Haloferax alexandrinus</i> strain JCM 10717                                    | 100.00                       |
| RK_AK1      | Asthmudi kayal, Kollam, Kerala               | MT322457         | <i>Haloferax alexandrinus</i> strain JCM 10717                                    | 100.00                       |
| RK_AK2      | Asthmudi kayal, Kollam, Kerala               | MT322458         | <i>Haloferax alexandrinus</i> strain JCM 10717                                    | 99.80                        |
| RK_AK3      | Asthmudi kayal, Kollam, Kerala               | MT322459         | <i>Haloferax lucentense</i> strain Aa 2.2                                         | 99.60                        |
| RK_AZ2      | Azheekal beach, Alappuzha, Kerala            | MT322462         | <i>Haloferax sulfurifontis</i> strain JCM 12327                                   | 100.00                       |
| RK_BB1      | Baga beach, Goa                              | MT322494         | <i>Virgibacillus dokdonensis</i> strain DSW10                                     | 99.65                        |
| RK_BB2      | Baga beach, Goa                              | MT322495         | <i>Halomonas halophila</i> strain NBRC 102604                                     | 99.64                        |
| RK_BB3      | Baga beach, Goa                              | MT322496         | <i>Halomonas halophila</i> strain NBRC 102604                                     | 99.59                        |
| RK_BB4      | Baga beach, Goa                              | MT322497         | <i>Halomonas halophila</i> strain NBRC 102604                                     | 99.6                         |
| RK_BI       | Bangaram island, Lakshadweep                 | MT322529         | <i>Halomonas smyrnensis</i> strain AAD6 16S                                       | 100                          |
| RK_CK       | Chavakkad, Thrissur, Kerala                  | MT322482         | <i>Halomonas halophila</i> strain DSM 4770                                        | 100.00                       |
| RK_CV       | Chavara beach, Kollam, Kerala                | MT322484         | <i>Halomonas halophila</i> strain DSM 4770                                        | 99.57                        |
| RK_CB1      | Cheetuva beach, Thrissur, Kerala             | MT322480         | <i>Chromohalobacter israelensis</i> strain Ba1                                    | 99.79                        |
| RK_CB2      | Cheetuva beach, Thrissur, Kerala             | MT322481         | <i>Salimicrobium halophilum</i> strain DSM 4771                                   | 99.57                        |
| RK_CR       | Cheetuva river, Thrissur, Kerala             | MT322483         | <i>Haloferax chudinovii</i> strain RS75                                           | 100.00                       |
| RK_CR1      | Cheetuva river, Thrissur,Kerala              | MT322463         | <i>Pontibacillus yanchengensis</i> strain Y32                                     | 99.15                        |
| RK_CV1      | Colva beach, Goa                             | MT322498         | <i>Staphylococcus edaphicus</i> strain CCM 8730                                   | 99.88                        |
| RK_CV2      | Colva beach, Goa                             | MT322499         | <i>Halomonas salina</i> strain F811                                               | 99.19                        |
| RK_CV3      | Colva beach, Goa                             | MT322500         | <i>Lysinibacillus cresolivorans</i> strain SC03                                   | 99.83                        |
| RK_CV4      | Colva beach, Goa                             | MT322501         | <i>Staphylococcus arlettae</i> strain ATCC 43957                                  | 99.88                        |
| RK_CV5      | Colva beach, Goa                             | MT322502         | <i>Pseudomonas stutzeri</i> strain ATCC 17588                                     | 99.84                        |
| RK_CV6      | Colva beach, Goa                             | MT322503         | <i>Virgibacillus dokdonensis</i> strain DSW10 16S                                 | 99.53                        |
| RK_DP1      | Dana Pani beach, Maharashtra                 | MT322530         | <i>Bacillus firmus</i> strain NCIMB 9366                                          | 100                          |
| RK_DB       | Devbagh Beach, Karnataka                     | MT322464         | <i>Haloferax lucentense</i> strain JCM 9276                                       | 99.76                        |
| RK_DM       | Dharmadam, Kannur, Kerala                    | MT322465         | <i>Haloferax lucentense</i> strain JCM 9276                                       | 100.00                       |
| RK_DH1      | Dona Paula Beach, Goa                        | MT322504         | <i>Halomonas halophila</i> strain NBRC 102604                                     | 100                          |
| RK_DM1      | Dumas beach, Gujarat                         | MT322507         | <i>Virgibacillus dokdonensis</i> strain DSW10                                     | 99.77                        |
| RK_DM2      | Dumas beach, Gujarat                         | MT322508         | <i>Bacillus zhangzhouensis</i> strain MCCC 1A08372                                | 100                          |
| RK_DM3      | Dumas beach, Gujarat                         | MT322509         | <i>Staphylococcus epidermidis</i> strain Fussel                                   | 100                          |
| RK_DM4      | Dumas beach, Gujarat                         | MT322510         | <i>Bacillus firmus</i> strain NCIMB 9366                                          | 99                           |
| RK_DM5      | Dumas beach, Gujarat                         | MT322511         | <i>Halomonas halophila</i> strain NBRC 102604                                     | 100                          |
| RK_ECO1     | Eco beach, Karnataka                         | MT322520         | <i>Virgibacillus dokdonensis</i> strain DSW10                                     | 100                          |
| RK_ECO2     | Eco beach, Karnataka                         | MT322521         | <i>Halomonas smyrnensis</i> strain AAD6                                           | 100                          |
| RK_KL       | Kallai, Kozhikode, Kerala                    | MT322466         | <i>Haloferax lucentense</i> strain JCM 9276                                       | 100.00                       |
| RK_KW1      | Karwar beach, Karnataka                      | MT322524         | <i>Acidovorax wautersii</i> strain NF 1078                                        | 98.85                        |
| RK_KW2      | Karwar beach, Karnataka                      | MT322525         | <i>Halomonas smyrnensis</i> strain AAD6 16S                                       | 99.8                         |
| RK_KW3      | Karwar beach, Karnataka                      | MT322526         | <i>Staphylococcus kloosii</i> strain ATCC 43959                                   | 99.74                        |
| RK_KB2      | Kollam beach, Kollam, Kerala                 | MT322485         | <i>Marinobacter oulmenensis</i> strain Set74                                      | 99.26                        |
| RK_KO       | Kovalam Beach, Thiruvananthapuram, Kerala    | MT322486         | <i>Marinobacter oulmenensis</i> strain Set74                                      | 100.00                       |
| RK_KU1      | Kundapura beach, Karnataka                   | MT322522         | <i>Staphylococcus saprophyticus</i> subsp. <i>saprophyticus</i> strain ATCC 15305 | 100                          |
| RK_KU2      | Kundapura beach, Karnataka                   | MT322523         | <i>Virgibacillus dokdonensis</i> strain DSW10                                     | 100                          |
| RK_KP1      | Kureepuzha, Kollam, Kerala                   | MT322467         | <i>Haloferax chudinovii</i> strain RS75                                           | 99.80                        |
| RK_KP2      | Kureepuzha, Kollam, Kerala                   | MT322468         | <i>Haloferax chudinovii</i> strain RS75                                           | 99.80                        |
| RK_MT       | Mattancherry, Ernakulam, Kerala              | MT322469         | <i>Haloferax alexandrinus</i> strain JCM 10717                                    | 99.80                        |
| RK_MY1      | Mayyanad, Kollam, Kerala                     | MT322487         | <i>Marinobacter oulmenensis</i> strain Set74                                      | 98.48                        |
| RK_MY2      | Mayyanad, Kollam, Kerala                     | MT322471         | <i>Haloferax lucentense</i> strain JCM 9276                                       | 99.80                        |
| RK_MY3      | Mayyanad, Kollam, Kerala                     | MT322472         | <i>Haloferax lucentense</i> strain Aa 2.2                                         | 99.60                        |
| RK_MY4      | Mayyanad, Kollam, Kerala                     | MT322473         | <i>Haloferax lucentense</i> strain Aa 2.2                                         | 99.58                        |
| RK_MY5      | Mayyanad, Kollam, Kerala                     | MT322488         | <i>Pontibacillus chungwhensis</i> strain BH030062                                 | 99.55                        |
| RK_MY6      | Mayyanad, Kollam, Kerala                     | MT322474         | <i>Haloferax lucentense</i> strain JCM 9276                                       | 99.80                        |
| RK_MB1      | Morbar beach, Goa                            | MT322505         | <i>Halomonas salina</i> strain F811 16S                                           | 98.97                        |
| RK_MU1      | Mulund saltpan, Maharashtra                  | MT322531         | <i>Virgibacillus dokdonensis</i> strain DSW10                                     | 99.42                        |
| RK_MU2      | Mulund saltpan, Maharashtra                  | MT322532         | <i>Staphylococcus aureus</i> strain S33 R                                         | 99.48                        |
| RK_MU5      | Mulund saltpan, Maharashtra                  | MT322533         | <i>Virgibacillus dokdonensis</i> strain DSW10                                     | 99.55                        |
| RK_MU4      | Mulund Saltpan, Maharashtra                  | MT322470         | <i>Haloferax alexandrinus</i> strain JCM 10717                                    | 99.80                        |
| RK_NG1      | Nargoal beach, Gujarat                       | MT322512         | <i>Staphylococcus</i> sp. clone WLA214 16S ribosomal RNA gene,                    | 100                          |
| RK_OK1      | Okha beach, Gujarat                          | MT322513         | <i>Virgibacillus dokdonensis</i> strain DSW10                                     | 99.55                        |
| RK_OK2      | Okha beach, Gujarat                          | MT322514         | <i>Bacillus firmus</i> strain NBRC 15306                                          | 99.49                        |
| RK_OK3      | Okha beach, Gujarat                          | MT322515         | <i>Staphylococcus saprophyticus</i> subsp. <i>saprophyticus</i> strain ATCC 15305 | 100                          |
| RK_PK       | Paddnakadappuram, Kasaragod, Kerala          | MT322489         | <i>Salimicrobium halophilum</i> strain NBRC 102426                                | 99.65                        |
| RK_PE1      | Paloelum beach, Goa                          | MT322506         | <i>Staphylococcus arlettae</i> strain ATCC 43957                                  | 99.88                        |
| RK_PM       | Payyambalam beach, Kannur, Kerala            | MT322475         | <i>Haloferax lucentense</i> strain JCM 9276                                       | 99.68                        |
| RK_PY       | Payyanur, Kannur, Kerala                     | MT322476         | <i>Haloferax lucentense</i> strain JCM 9276                                       | 100.00                       |
| RK_PN       | Ponnani, Malappuram, Kerala                  | MT322490         | <i>Salimicrobium luteum</i> strain BY-5                                           | 99.79                        |
| RK_PB1      | Porbandar beach, Gujarat                     | MT322516         | <i>Virgibacillus dokdonensis</i> strain DSW10                                     | 99.55                        |
| RK_PB2      | Porbandar beach, Gujarat                     | MT322517         | <i>Halomonas halophila</i> strain NBRC 102604                                     | 99.27                        |
| RK_SM       | Shamugam beach, Thiruvananthapuram, Kerala   | MT322491         | <i>Pontibacillus yanchengensis</i> strain Y32                                     | 99                           |
| RK_SN1      | Somnath beach, Gujarat                       | MT322518         | <i>Virgibacillus dokdonensis</i> strain DSW10                                     | 99.88                        |
| RK_SN2      | Somnath beach, Gujarat                       | MT322519         | <i>Virgibacillus dokdonensis</i> strain DSW10                                     | 100                          |
| RK_TB       | Tannirbhavi beach, Karnataka                 | MT322527         | <i>Virgibacillus dokdonensis</i> strain DSW10                                     | 100                          |
| RK_TY       | Thalassery, Kannur, Kerala                   | MT322477         | <i>Haloferax lucentense</i> strain JCM 9276                                       | 99.79                        |
| RK_VP       | Valapattanam, Kannur, Kerala                 | MT322479         | <i>Haloferax lucentense</i> strain JCM 9276                                       | 100.00                       |
| RK_VP1      | Valiya paramba,Kasargod,Kerala               | MT322492         | <i>Salimicrobium halophilum</i> strain NBRC 102426                                | 100.00                       |
| RK_VB       | Varkala beach, Thiruvananthapuram, Kerala    | MT322478         | <i>Haloferax chudinovii</i> strain RS75                                           | 99.79                        |



**Table S4: The metagenome data set were retrieved from the MG-RAST server for the comparative analysis of the open sea and coastal microbiome. Sampling with a distance of 100+ km away, calculated manually with <https://www.freemaptools.com/measure-distance.htm>, from coastline was considered as open sea.**

| S.No | MG-RAST_id   | Biosystem  | Km       | Latitude | Longitude | Country           | Location                                                                |
|------|--------------|------------|----------|----------|-----------|-------------------|-------------------------------------------------------------------------|
| 1    | mgm4441121.3 | Open Ocean | 7702.546 | -15.2778 | -148.224  | French Polynesia  | Polynesia Archipelagos - Tikehau Lagoon                                 |
| 2    | mgm4441124.3 | Open Ocean | 1977.819 | -2.58194 | -97.8514  |                   | Tropical South Pacific                                                  |
| 3    | mgm4441133.3 | Open Ocean | 1176.334 | -12.0925 | 96.88167  | Australia         | Indian Ocean - Cocos Keeling_ Inside Lagoon                             |
| 4    | mgm4441134.3 | Open Ocean | 1801.178 | -10.4461 | 88.3027   |                   | Indian Ocean                                                            |
| 5    | mgm4441135.3 | Open Ocean | 335.7092 | -26.035  | 50.123    | Madagascar        | Indian Ocean - Madagascar Waters                                        |
| 6    | mgm4441139.3 | Open Ocean | 1122.212 | -12.0925 | 96.88167  | Australia         | Indian Ocean - Cocos Keeling_ Inside Lagoon                             |
| 7    | mgm4441139.4 | Open Ocean | 813.1854 | -30.8983 | 40.4203   |                   | Indian Ocean - International waters between Madagascar and South Africa |
| 8    | mgm4441146.3 | Open Ocean | 4878.034 | -10.1314 | -135.449  | French Polynesia  | Tropical South Pacific - 201 miles from F. Polynesia                    |
| 9    | mgm4441147.3 | Open Ocean | 2368.085 | -8.505   | 80.3756   |                   | Indian Ocean                                                            |
| 10   | mgm4441148.3 | Open Ocean | 2891.074 | -4.6136  | 55.5086   | Seychelles        | Indian Ocean - St. Anne Island_ Seychelles                              |
| 11   | mgm4441149.3 | Open Ocean | 1746.766 | -4.635   | 56.8361   | Seychelles        | Outside Seychelles_ Indian Ocean                                        |
| 12   | mgm4441150.3 | Open Ocean | 2270.253 | -4.6625  | 60.5231   |                   | Indian Ocean                                                            |
| 13   | mgm4441151.3 | Open Ocean | 1705.052 | -23.2161 | 52.3061   |                   | Indian Ocean - International Water Outside of Reunion Island            |
| 14   | mgm4441155.3 | Open Ocean | 2699.835 | -10.9436 | 92.05889  |                   | Indian Ocean                                                            |
| 15   | mgm4441156.3 | Open Ocean | 2114.485 | -9.59694 | 84.1957   |                   | Indian Ocean                                                            |
| 16   | mgm4441572.3 | Open Ocean | 1153.562 | 31.175   | -64.324   | Bermuda           | Sargasso Sea                                                            |
| 17   | mgm4441574.3 | Open Ocean | 1116.515 | 32.1748  | -64.0102  | Bermuda           | Sargasso Sea                                                            |
| 18   | mgm4441575.3 | Open Ocean | 1285.029 | 31.175   | -64.324   | Bermuda           | Sargasso Sea                                                            |
| 19   | mgm4441576.3 | Open Ocean | 1059.64  | 32.1667  | -64.5     | Bermuda           | Sargasso Sea                                                            |
| 20   | mgm4441578.3 | Coastal    | 21.37209 | 32.1667  | -64.5     | Bermuda           | Sargasso Sea                                                            |
| 21   | mgm4441579.3 | Open Ocean | 1187.117 | 42.5031  | -67.24    | Canada            | Gulf of Maine                                                           |
| 22   | mgm4441581.3 | Coastal    | 0        | 44.69    | -63.637   | Canada            | Bedford Basin_ Nova Scotia                                              |
| 23   | mgm4441582.3 | Coastal    | 0        | 44.112   | -64.9467  | Canada            | Bay of Fundy_ Nova Scotia                                               |
| 24   | mgm4441583.3 | Coastal    | 0        | 41.4858  | -71.3511  | USA               | Newport Harbor_ RI                                                      |
| 25   | mgm4441587.3 | Open Ocean | 158.9227 | 20.5225  | -85.4136  | Mexico            | Yucatan Channel                                                         |
| 26   | mgm4441588.3 | Open Ocean | 241.2568 | 18.0367  | -83.785   | Honduras          | Caribbean Sea_ Rosario Bank                                             |
| 27   | mgm4441590.3 | Coastal    | 0        | 9.1644   | -79.8361  | Panama            | Lake Gatun_ Panama                                                      |
| 28   | mgm4441591.3 | Coastal    | 40.29797 | 8.1292   | -79.6911  | Panama            | Eastern Tropical Pacific_ Gulf of Panama                                |
| 29   | mgm4441592.3 | Open Ocean | 210.6631 | 6.4927   | -82.9039  | Panama            | Eastern Tropical Pacific_ 250 miles from Panama City                    |
| 30   | mgm4441593.3 | Open Ocean | 542.2363 | 5.55278  | -87.0878  | Costa Rica        | Eastern Tropical Pacific_ Dirty Rock_ Cocos Island                      |
| 31   | mgm4441595.3 | Open Ocean | 1173.131 | 1.2161   | -90.4228  | Ecuador           | Galapagos Islands_ Devil                                                |
| 32   | mgm4441603.3 | Open Ocean | 5960.672 | -17.4758 | -149.812  | French Polynesia  | Polynesia Archipelagos - Moorea_ Cooks Bay                              |
| 33   | mgm4441606.3 | Open Ocean | 220.0456 | 12.0925  | 96.88167  | Australia         | Indian Ocean - Cocos Keeling_ Inside Lagoon                             |
| 34   | mgm4441607.3 | Open Ocean | 2426.022 | -10.4461 | 88.3027   |                   | Indian Ocean                                                            |
| 35   | mgm4441608.3 | Open Ocean | 2404.07  | -10.4461 | 88.30278  |                   | Indian Ocean                                                            |
| 36   | mgm4441609.3 | Open Ocean | 2455.119 | -8.505   | 80.3756   |                   | Indian Ocean                                                            |
| 37   | mgm4441610.3 | Open Ocean | 1716.06  | -7.0075  | 76.3314   |                   | Indian Ocean                                                            |
| 38   | mgm4441611.3 | Coastal    | 0        | -4.99028 | 64.9767   |                   | Indian Ocean - 500 Miles west of the Seychelles in the Indian Ocean     |
| 39   | mgm4441613.3 | Open Ocean | 1822.18  | -4.6136  | 55.5086   | Seychelles        | Indian Ocean - St. Anne Island_ Seychelles                              |
| 40   | mgm4441614.3 | Open Ocean | 1057.677 | -29.3489 | 43.2156   |                   | Indian Ocean - International water between Madagascar and South Africa  |
| 41   | mgm4441615.3 | Open Ocean | 811.1416 | -30.8983 | 40.4203   |                   | Indian Ocean - International waters between Madagascar and South Africa |
| 42   | mgm4441616.3 | Open Ocean | 587.2174 | -32.3992 | 36.5919   |                   | Indian Ocean - International water between Madagascar and South Africa  |
| 43   | mgm4441617.3 | Coastal    | 24.59078 | -6.3167  | 39.55     | Tanzania          | Indian Ocean - East coast Zanzibar (Tanzania)_ offshore Paje lagoon     |
| 44   | mgm4441618.3 | Coastal    | 0        | -6.1167  | 39.1167   | Tanzania          | Indian Ocean - West coast Zanzibar (Tanzania)_ harbour region           |
| 45   | mgm4441659.3 | Coastal    | 45.51225 | 32.5069  | -79.2639  | USA               | North American East Coast_ South of Charleston_ SC                      |
| 46   | mgm4441660.3 | Open Ocean | 373.1908 | 24.1747  | -84.344   | USA               | Caribbean Sea_ Gulf of Mexico                                           |
| 47   | mgm4441661.3 | Coastal    | 0        | 5.64     | -86.565   | Costa Rica        | Eastern Tropical Pacific_ 30 miles from Cocos Island                    |
| 48   | mgm4561566.3 | Coastal    | 0        | 31.50805 | 35.471    | Dead Sea          | Israel                                                                  |
| 49   | mgm4722281.3 | Coastal    | 80.11314 | 42.2038  | 17.715    | Mediterranean Sea | Mediterranean Sea                                                       |
| 50   | mgm4722290.3 | Open Ocean | 427.1843 | -60.2287 | -60.6476  | Southern Ocean    | Southern Ocean                                                          |
| 51   | mgm4722304.3 | Coastal    | 0        | 18.3967  | 39.875    | Indian Ocean      | Red Sea                                                                 |
| 52   | mgm4722291.3 | Open Ocean | 434.0562 | 20.8183  | 63.5047   | Indian Ocean      | Indian Ocean                                                            |
| 53   | mgm4722283.3 | Coastal    | 67.12574 | 27.16    | 34.835    | Indian Ocean      | Red Sea                                                                 |
| 54   | mgm4722302.3 | Open Ocean | 498.0598 | -5.2529  | -85.1545  | Pacific Ocean     | South Pacific Ocean                                                     |
| 55   | mgm4722300.3 | Coastal    | 0        | 35.759   | 14.2574   | Mediterranean Sea | Mediterranean Sea                                                       |
| 56   | mgm4722298.3 | Coastal    | 41.27967 | 36.5533  | -6.5669   | Atlantic Ocean    | North Atlantic Ocean                                                    |
| 57   | mgm4722307.3 | Open Ocean | 552.5361 | -47.1863 | -58.2902  | Atlantic Ocean    | South Atlantic Ocean                                                    |
| 58   | mgm4722277.3 | Coastal    | 0        | -20.9354 | -35.1803  | Atlantic Ocean    | South Atlantic Ocean                                                    |
| 59   | mgm4722314.3 | Open Ocean | 552.6487 | -47.1863 | -58.2902  | Atlantic Ocean    | South Atlantic Ocean                                                    |
| 60   | mgm4722301.3 | Open Ocean | 5288.852 | 0.0003   | -153.676  | Pacific Ocean     | South Pacific Ocean                                                     |
| 61   | mgm4722294.3 | Open Ocean | 106.0236 | 23.36    | 37.2183   | Indian Ocean      | Red Sea                                                                 |
| 62   | mgm4722312.3 | Coastal    | 96.75376 | 39.3888  | 19.3905   | Mediterranean Sea | Mediterranean Sea                                                       |
| 63   | mgm4722303.3 | Open Ocean | 1128.762 | 0.0033   | 71.6428   | Indian Ocean      | Indian Ocean                                                            |
| 64   | mgm4722293.3 | Coastal    | 94.99958 | 21.9467  | 38.2517   | Indian Ocean      | Red Sea                                                                 |
| 65   | mgm4722287.3 | Open Ocean | 5288.498 | -8.9111  | -142.557  | Pacific Ocean     | South Pacific Ocean                                                     |
| 66   | mgm4722310.3 | Coastal    | 96.93079 | 21.9467  | 38.2517   | Indian Ocean      | Red Sea                                                                 |
| 67   | mgm4722276.3 | Open Ocean | 1670.821 | -20.4091 | -3.1759   | Atlantic Ocean    | South Atlantic Ocean                                                    |
| 68   | mgm4722285.3 | Open Ocean | 368.6041 | 25.5264  | -88.394   | Atlantic Ocean    | North Atlantic Ocean                                                    |
| 69   | mgm4722282.3 | Open Ocean | 464.6015 | 6.0001   | 73.8955   | Indian Ocean      | Indian Ocean                                                            |
| 70   | mgm4722315.3 | Open Ocean | 3414.529 | 31.5213  | -158.996  | Pacific Ocean     | North Pacific Ocean                                                     |
| 71   | mgm4779568.3 | Coastal    | 0        | -68.5602 | 78.19686  | Antarctica        | Deep_lake                                                               |
| 72   | mgm4779570.3 | Coastal    | 0        | 37.78556 | -0.78722  | Spain             | Mar_menor                                                               |
| 73   | mgm4779571.3 | Coastal    | 0.257495 | 23.94056 | 70.18778  | India             | Kutch_Desert                                                            |
| 74   | mgm4779572.3 | Coastal    | 0        | 51.62    | 79.84     | Russia            | Kulunda_steppe                                                          |
| 75   | mgm4779573.3 | Coastal    | 0        | -35.32   | 142.8     | Australia         | Lake_tyrrel                                                             |
| 76   | mgm4779575.3 | Coastal    | 0        | 39.33167 | -0.35222  | Spain             | Albufera                                                                |
| 77   | mgm4779576.3 | Coastal    | 0        | -35.32   | 142.8     | Australia         | Lake_tyrrel                                                             |
| 78   | mgm4779577.3 | Coastal    | 0        | -35.32   | 142.8     | Australia         | Lake_tyrrel                                                             |
| 79   | mgm4779578.3 | Coastal    | 0        | 51.67    | 79.91     | Russia            | Kulunda_steppe                                                          |
| 80   | mgm4779580.3 | Coastal    | 0        | 49.73046 | -119.874  | Canada            | British_Columbia                                                        |
| 81   | mgm4779582.3 | Coastal    | 0        | 38.2     | -0.6      | Spain             | Santa_Pola                                                              |
| 82   | mgm4779583.3 | Coastal    | 0        | 79.11667 | -90.35    | Canada            | Lost_hammer                                                             |
| 83   | mgm4779585.3 | Coastal    | 0        | -33.4261 | 121.689   | Australia         | Yilgarn_Craton                                                          |
| 84   | mgm4779586.3 | Coastal    | 0        | 37.78556 | -0.78722  | Spain             | Mar_menor                                                               |
| 85   | mgm4779587.3 | Coastal    | 0        | -35.32   | 142.8     | Australia         | Lake_tyrrel                                                             |
| 86   | mgm4779588.3 | Coastal    | 0        | -35.32   | 142.8     | Australia         | Lake_tyrrel                                                             |
| 87   | mgm4779589.3 | Coastal    | 0        | 49.73046 | -119.874  | Canada            | British_Columbia                                                        |
| 88   | mgm4779590.3 | Coastal    | 0        | -35.32   | 142.8     | Australia         | Lake_tyrrel                                                             |
| 89   | mgm4779591.3 | Coastal    | 0        | 23.94083 | 70.18833  | India             | Kutch_Desert                                                            |



|     |              |            |          |          |          |            |                   |
|-----|--------------|------------|----------|----------|----------|------------|-------------------|
| 90  | mgm4779592.3 | Coastal    | 0        | -35.32   | 142.8    | Australia  | Lake_tyrrel       |
| 91  | mgm4779593.3 | Coastal    | 0        | 23.94139 | 70.18833 | India      | Kutch_Desert      |
| 92  | mgm4779594.3 | Coastal    | 0        | -35.32   | 142.8    | Australia  | Lake_tyrrel       |
| 93  | mgm4779595.3 | Coastal    | 0        | 51.73    | 79.87    | Russia     | Kulunda_steppe    |
| 94  | mgm4779596.3 | Coastal    | 0        | 51.65    | 79.75    | Russia     | Kulunda_steppe    |
| 95  | mgm4779598.3 | Coastal    | 0        | 38.2     | -0.6     | Spain      | Santa_pola        |
| 96  | mgm4779600.3 | Coastal    | 0        | 37.78556 | -0.78722 | Spain      | Mar_menor         |
| 97  | mgm4779601.3 | Coastal    | 0        | 38.2     | -0.6     | Spain      | Santa_Pola        |
| 98  | mgm4779602.3 | Coastal    | 0        | 51.62    | 79.84    | Russia     | Kulunda_steppe    |
| 99  | mgm4779603.3 | Coastal    | 0        | 38.2     | -0.6     | Spain      | Santa_Pola        |
| 100 | mgm4779604.3 | Coastal    | 0        | 23.7925  | 71.00556 | India      | Kutch_Desert      |
| 101 | mgm4779605.3 | Coastal    | 0        | 51.65    | 79.75    | Russia     | Kulunda_steppe    |
| 102 | mgm4779606.3 | Coastal    | 0        | -68.5602 | 78.19686 | Antarctica | Deep_lake         |
| 103 | mgm4779607.3 | Coastal    | 0        | 51.73    | 79.87    | Russia     | Kulunda_steppe    |
| 104 | mgm4779608.3 | Coastal    | 0        | 23.835   | 69.51889 | India      | Kutch_Desert      |
| 105 | mgm4779609.3 | Coastal    | 0        | -35.32   | 142.8    | Australia  | Lake_tyrrel       |
| 106 | mgm4779610.3 | Coastal    | 0        | -35.32   | 142.8    | Australia  | Lake_tyrrel       |
| 107 | mgm4779611.3 | Coastal    | 0        | -33.4261 | 121.689  | Australia  | Yilgarn_Craton    |
| 108 | mgm4779613.3 | Coastal    | 0        | 49.73046 | -119.874 | Canada     | British_Columbia  |
| 109 | mgm4779616.3 | Coastal    | 0        | 23.81083 | 78.98333 | India      | Kutch_Desert      |
| 110 | mgm4779617.3 | Coastal    | 0        | -35.32   | 142.8    | Australia  | Lake_tyrrel       |
| 111 | mgm4779618.3 | Coastal    | 0        | 39.33167 | -0.35222 | Spain      | Albufera          |
| 112 | mgm4779619.3 | Coastal    | 0.241402 | 37.21889 | -7.33806 | Spain      | Isla_Cristina     |
| 113 | mgm4581707.3 | Coastal    | 59.83541 | 31.852   | 29.9822  | Egypt      | Egypt             |
| 114 | mgm4581709.3 | Coastal    | 59.83541 | 31.852   | 29.9822  | Egypt      | Egypt             |
| 115 | mgm4581710.3 | Coastal    | 59.83541 | 31.852   | 29.9822  | Egypt      | Egypt             |
| 116 | mgm4581711.3 | Coastal    | 59.83541 | 31.852   | 29.9822  | Egypt      | Egypt             |
| 117 | mgm4581712.3 | Coastal    | 59.83541 | 31.852   | 29.9822  | Egypt      | Egypt             |
| 118 | mgm4581713.3 | Coastal    | 59.83541 | 31.852   | 29.9822  | Egypt      | Egypt             |
| 119 | mgm4849668.3 | Coastal    | 44.53055 | -31.9998 | 115.5145 | Australia  | Rottnest_Island   |
| 120 | mgm4849678.3 | Coastal    | 44.53055 | -31.9966 | 115.5315 | Australia  | Rottnest_Island   |
| 121 | mgm4849698.3 | Coastal    | 44.53055 | -31.9966 | 115.5315 | Australia  | Rottnest_Island   |
| 122 | mgm4849710.3 | Coastal    | 44.53055 | -31.9966 | 115.5315 | Australia  | Rottnest_Island   |
| 123 | mgm4849716.3 | Coastal    | 41.77857 | -31.9956 | 115.5369 | Australia  | Rottnest_Island   |
| 124 | mgm4849786.3 | Coastal    | 41.77857 | -32.0027 | 115.526  | Australia  | Rottnest_Island   |
| 125 | mgm4849790.3 | Coastal    | 41.77857 | -31.9974 | 115.5366 | Australia  | Rottnest_Island   |
| 126 | mgm4849796.3 | Coastal    | 41.77857 | -32.0027 | 115.526  | Australia  | Rottnest_Island   |
| 127 | mgm4670271.3 | Coastal    | 80.30627 | -63.18   | -60.67   | Antarctica | deception_island  |
| 128 | mgm4670272.3 | Open Ocean | 159.5665 | -62.96   | -60.71   | Antarctica | deception_island  |
| 129 | mgm4670273.3 | Open Ocean | 159.5665 | -62.96   | -60.71   | Antarctica | deception_island  |
| 130 | mgm4670275.3 | Coastal    | 80.30627 | -63.18   | -60.67   | Antarctica | deception_island  |
| 131 | mgm4670276.3 | Open Ocean | 159.5665 | -62.96   | -60.71   | Antarctica | deception_island  |
| 132 | mgm4670277.3 | Coastal    | 80.30627 | -63.18   | -60.67   | Antarctica | deception_island  |
| 133 | mgm4670279.3 | Coastal    | 80.30627 | -63.18   | -60.67   | Antarctica | deception_island  |
| 134 | mgm4670280.3 | Open Ocean | 159.5665 | -62.96   | -60.71   | Antarctica | deception_island  |
| 135 | mgm4670281.3 | Coastal    | 80.30627 | -63.18   | -60.67   | Antarctica | deception_island  |
| 136 | mgm4670282.3 | Open Ocean | 159.5665 | -62.96   | -60.71   | Antarctica | deception_island  |
| 137 | mgm4670283.3 | Open Ocean | 159.5665 | -62.96   | -60.71   | Antarctica | deception_island  |
| 138 | mgm4670284.3 | Open Ocean | 159.5665 | -62.96   | -60.71   | Antarctica | deception_island  |
| 139 | mgm4670285.3 | Open Ocean | 159.5665 | -62.96   | -60.71   | Antarctica | deception_island  |
| 140 | mgm4670286.3 | Coastal    | 80.30627 | -63.18   | -60.67   | Antarctica | deception_island  |
| 141 | mgm4670287.3 | Coastal    | 80.30627 | -63.18   | -60.67   | Antarctica | deception_island  |
| 142 | mgm4670288.3 | Coastal    | 80.30627 | -63.18   | -60.67   | Antarctica | deception_island  |
| 143 | mgm4581719.3 | Coastal    | 95.6755  | 23.02528 | 60.86639 | Pakistan   | Indus_River_Basin |
| 144 | mgm4581720.3 | Coastal    | 95.6755  | 23.02528 | 60.86639 | Pakistan   | Indus_River_Basin |
| 145 | mgm4581721.3 | Coastal    | 95.6755  | 23.02528 | 60.86639 | Pakistan   | Indus_River_Basin |
| 146 | mgm4581722.3 | Coastal    | 95.6755  | 23.02528 | 60.86639 | Pakistan   | Indus_River_Basin |
| 147 | mgm4581723.3 | Coastal    | 95.6755  | 23.02528 | 60.86639 | Pakistan   | Indus_River_Basin |
| 148 | mgm4581724.3 | Coastal    | 95.6755  | 23.02528 | 60.86639 | Pakistan   | Indus_River_Basin |
| 149 | mgm4581725.3 | Coastal    | 95.6755  | 23.02528 | 60.86639 | Pakistan   | Indus_River_Basin |
| 150 | mgm4581726.3 | Coastal    | 95.6755  | 23.02528 | 60.86639 | Pakistan   | Indus_River_Basin |
| 151 | mgm4581729.3 | Coastal    | 95.6755  | 23.02528 | 60.86639 | Pakistan   | Indus_River_Basin |
| 152 | mgm4581730.3 | Coastal    | 95.6755  | 23.02528 | 60.86639 | Pakistan   | Indus_River_Basin |
| 153 | mgm4581731.3 | Coastal    | 95.6755  | 23.02528 | 60.86639 | Pakistan   | Indus_River_Basin |
| 154 | mgm4581732.3 | Coastal    | 95.6755  | 23.02528 | 60.86639 | Pakistan   | Indus_River_Basin |
| 155 | mgm4581733.3 | Coastal    | 95.6755  | 23.02528 | 60.86639 | Pakistan   | Indus_River_Basin |
| 156 | mgm4581734.3 | Coastal    | 95.6755  | 23.02528 | 60.86639 | Pakistan   | Indus_River_Basin |
| 157 | mgm4581735.3 | Coastal    | 95.6755  | 23.02528 | 60.86639 | Pakistan   | Indus_River_Basin |
| 158 | mgm4581736.3 | Coastal    | 95.6755  | 23.02528 | 60.86639 | Pakistan   | Indus_River_Basin |
| 159 | mgm4581737.3 | Coastal    | 95.6755  | 23.02528 | 60.86639 | Pakistan   | Indus_River_Basin |
| 160 | mgm4581738.3 | Coastal    | 95.6755  | 23.02528 | 60.86639 | Pakistan   | Indus_River_Basin |
| 161 | mgm4581739.3 | Coastal    | 95.6755  | 23.02528 | 60.86639 | Pakistan   | Indus_River_Basin |
| 162 | mgm4581740.3 | Coastal    | 95.6755  | 23.02528 | 60.86639 | Pakistan   | Indus_River_Basin |
| 163 | mgm4581741.3 | Coastal    | 95.6755  | 23.02528 | 60.86639 | Pakistan   | Indus_River_Basin |
| 164 | mgm4581742.3 | Coastal    | 95.6755  | 23.02528 | 60.86639 | Pakistan   | Indus_River_Basin |
| 165 | mgm4581745.3 | Coastal    | 95.6755  | 23.02528 | 60.86639 | Pakistan   | Indus_River_Basin |
| 166 | mgm4581746.3 | Coastal    | 95.6755  | 23.02528 | 60.86639 | Pakistan   | Indus_River_Basin |
| 167 | mgm4581749.3 | Coastal    | 95.6755  | 23.02528 | 60.86639 | Pakistan   | Indus_River_Basin |
| 168 | mgm4581751.3 | Coastal    | 95.6755  | 23.02528 | 60.86639 | Pakistan   | Indus_River_Basin |
| 169 | mgm4581753.3 | Coastal    | 95.6755  | 23.02528 | 60.86639 | Pakistan   | Indus_River_Basin |
| 170 | mgm4581754.3 | Coastal    | 95.6755  | 23.02528 | 60.86639 | Pakistan   | Indus_River_Basin |
| 171 | mgm4581755.3 | Coastal    | 95.6755  | 23.02528 | 60.86639 | Pakistan   | Indus_River_Basin |
| 172 | mgm4581758.3 | Coastal    | 95.6755  | 23.02528 | 60.86639 | Pakistan   | Indus_River_Basin |
| 173 | mgm4581759.3 | Coastal    | 95.6755  | 23.02528 | 60.86639 | Pakistan   | Indus_River_Basin |
| 174 | mgm4581760.3 | Coastal    | 95.6755  | 23.02528 | 60.86639 | Pakistan   | Indus_River_Basin |
| 175 | mgm4581761.3 | Coastal    | 95.6755  | 23.02528 | 60.86639 | Pakistan   | Indus_River_Basin |
| 176 | mgm4581762.3 | Coastal    | 95.6755  | 23.02528 | 60.86639 | Pakistan   | Indus_River_Basin |
| 177 | mgm4581763.3 | Coastal    | 95.6755  | 23.02528 | 60.86639 | Pakistan   | Indus_River_Basin |
| 178 | mgm4581764.3 | Coastal    | 95.6755  | 23.02528 | 60.86639 | Pakistan   | Indus_River_Basin |
| 179 | mgm4581765.3 | Coastal    | 95.6755  | 23.02528 | 60.86639 | Pakistan   | Indus_River_Basin |
| 180 | mgm4581766.3 | Coastal    | 95.6755  | 23.02528 | 60.86639 | Pakistan   | Indus_River_Basin |
| 181 | mgm4581767.3 | Coastal    | 95.6755  | 23.02528 | 60.86639 | Pakistan   | Indus_River_Basin |
| 182 | mgm4581769.3 | Coastal    | 95.6755  | 23.02528 | 60.86639 | Pakistan   | Indus_River_Basin |
| 183 | mgm4581770.3 | Coastal    | 95.6755  | 23.02528 | 60.86639 | Pakistan   | Indus_River_Basin |
| 184 | mgm4581771.3 | Coastal    | 95.6755  | 23.02528 | 60.86639 | Pakistan   | Indus_River_Basin |
| 185 | mgm4581772.3 | Coastal    | 95.6755  | 23.02528 | 60.86639 | Pakistan   | Indus_River_Basin |

|     |              |         |         |          |          |          |                   |
|-----|--------------|---------|---------|----------|----------|----------|-------------------|
| 186 | mgm4581773.3 | Coastal | 95.6755 | 23.02528 | 60.86639 | Pakistan | Indus River Basin |
| 187 | mgm4581776.3 | Coastal | 95.6755 | 23.02528 | 60.86639 | Pakistan | Indus River Basin |
| 188 | mgm4581778.3 | Coastal | 95.6755 | 23.02528 | 60.86639 | Pakistan | Indus River Basin |
| 189 | mgm4581779.3 | Coastal | 95.6755 | 23.02528 | 60.86639 | Pakistan | Indus River Basin |
| 190 | mgm4581780.3 | Coastal | 95.6755 | 23.02528 | 60.86639 | Pakistan | Indus River Basin |
| 191 | mgm4581782.3 | Coastal | 95.6755 | 23.02528 | 60.86639 | Pakistan | Indus River Basin |
| 192 | mgm4581783.3 | Coastal | 95.6755 | 23.02528 | 60.86639 | Pakistan | Indus River Basin |
| 193 | mgm4581784.3 | Coastal | 95.6755 | 23.02528 | 60.86639 | Pakistan | Indus River Basin |
| 194 | mgm4581785.3 | Coastal | 95.6755 | 23.02528 | 60.86639 | Pakistan | Indus River Basin |
| 195 | mgm4581787.3 | Coastal | 95.6755 | 23.02528 | 60.86639 | Pakistan | Indus River Basin |
| 196 | mgm4581788.3 | Coastal | 95.6755 | 23.02528 | 60.86639 | Pakistan | Indus River Basin |
| 197 | mgm4581789.3 | Coastal | 95.6755 | 23.02528 | 60.86639 | Pakistan | Indus River Basin |
| 198 | mgm4581790.3 | Coastal | 95.6755 | 23.02528 | 60.86639 | Pakistan | Indus River Basin |
| 199 | mgm4671023.3 | Coastal | 95.6755 | 23.02528 | 60.86639 | Pakistan | Arabian Sea       |
| 200 | mgm4671024.3 | Coastal | 95.6755 | 23.02528 | 60.86639 | Pakistan | Arabian Sea       |
| 201 | mgm4671025.3 | Coastal | 95.6755 | 23.02528 | 60.86639 | Pakistan | Arabian Sea       |
| 202 | mgm4667575.3 | Coastal | 0       | 12.08829 | 75.17603 | India    | Kavayi            |
| 203 | mgm4667708.3 | Coastal | 0       | 9.996566 | 76.24719 | India    | Valpadananam      |
| 204 | mgm4667773.3 | Coastal | 0       | 12.70833 | 74.90075 | India    | Bangramanjeshwar  |
| 205 | mgm4667861.3 | Coastal | 0       | 12.5942  | 74.94662 | India    | Kumbla            |
| 206 | mgm4671368.3 | Coastal | 0       | 9.895994 | 76.32609 | India    | Panangod          |
| 207 | mgm4671369.3 | Coastal | 0       | 9.90919  | 76.30629 | India    | Madakal           |
| 208 | mgm4671370.3 | Coastal | 0       | 12.10507 | 75.2058  | India    | Pyannur           |
| 209 | mgm4671371.3 | Coastal | 0       | 9.999414 | 76.25371 | India    | Vallarpadam       |

Table S5: Sampling locations (n=410) across the Arabian seacoast (India) from seven biosystems.

| State  | Location               | Latitude Longitude        | Biosystem |
|--------|------------------------|---------------------------|-----------|
| Kerala | Manjeshwar beach       | 12 44'00.8"N 74 52'30.4"E | Seashore  |
| Kerala | Cherangai beach,       | 12 30'57.0"N 74 58'05.3"E | Seashore  |
| Kerala | Chembirika beach       | 12 26'44.0"N 75 00'03.7"E | Seashore  |
| Kerala | Bekal fort             | 12 23'27.3"N 75 02'05.2"E | Seashore  |
| Kerala | Kannuveedu kadapuram   | 12 06'42.6"N 75 09'20.0"E | Seashore  |
| Kerala | Padmnakadappuram       | 12 09'45.9"N 75 08'06.9"E | Seashore  |
| Kerala | Thaidakappuram, kerala | 12 14'26.6"N 75 06'20.8"E | Seashore  |
| Kerala | Valiyaparambu          | 12 08'20.9"N 75 08'51.7"E | River     |
| Kerala | Thejaswani river       | 12 14'05.2"N 75 08'43.6"E | River     |
| Kerala | Karyangod river        | 12 15'59.8"N 75 07'16.3"E | River     |
| Kerala | Kuniyan river          | 12 06'57.4"N 75 11'25.0"E | River     |
| Kerala | Valiyaparambu          | 12 07'31.8"N 75 09'32.7"E | Estuary   |
| Kerala | Azhi pozhi             | 12 28'23.5"N 74 59'04.8"E | Estuary   |
| Kerala | Bambrana-arikkadi      | 12 36'20.7"N 74 56'08.8"E | Mangrove  |
| Kerala | Koyippady village      | 12 35'35.6"N 74 56'26.6"E | Mangrove  |
| Kerala | Shiriya                | 12 37'00.7"N 74 55'57.8"E | Mangrove  |
| Kerala | Madakkal               | 12 06'35.3"N 75 10'04.5"E | Mangrove  |
| Kerala | Ettikulam beach        | 12 00'39.5"N 75 12'36.3"E | Seashore  |
| Kerala | Mattool beach          | 11 59'37.6"N 75 15'38.5"E | Seashore  |
| Kerala | Payyabalam beach       | 11 52'18.8"N 75 21'03.0"E | Seashore  |
| Kerala | Thottada beach         | 11.838401"N 75 24'12.2"E  | Seashore  |
| Kerala | Chalad beach           | 11 52'49.3"N 75 20'41.0"E | Seashore  |
| Kerala | Chootad beach          | 12 01'16.2"N 75 13'53.1"E | Seashore  |
| Kerala | Muzhappilangad         | 11 47'46.3"N 75 26'31.5"E | Seashore  |
| Kerala | Dharmadam beach        | 11 46'37.2"N 75 27'16.7"E | Seashore  |
| Kerala | Kannur beach           | 11 51'26.3"N 75 23'00.3"E | Seashore  |
| Kerala | Thalassery beach       | 11 44'47.3"N 75 29'12.9"E | Seashore  |
| Kerala | Azhikkal               | 11 56'46.7"N 75 17'41.9"E | Estuary   |
| Kerala | Dharmadam              | 11 46'39.4"N 75 27'20.8"E | Estuary   |
| Kerala | Payyanur               | 12 05'20.7"N 75 11'30.8"E | Mangrove  |
| Kerala | Chemballikkundu        | 12 02'58.9"N 75 15'10.9"E | Mangrove  |
| Kerala | Valappattanam          | 11 55'51.4"N 75 21'02.7"E | Mangrove  |
| Kerala | Dharmadam              | 11 46'34.1"N 75 27'18.8"E | Mangrove  |
| Kerala | Thalassery             | 11 46'02.7"N 75 28'57.9"E | Mangrove  |
| Kerala | Kavvayi                | 12 05'53.2"N 75 10'42.1"E | Mangrove  |
| Kerala | Perumba                | 12 05'24.2"N 75 11'09.8"E | River     |
| Kerala | Kavvayi river          | 12 05'36.5"N 75 11'07.0"E | River     |
| Kerala | Valappattanam river    | 11 56'06.5"N 75 20'47.7"E | River     |
| Kerala | Mahe beach             | 11 42'14.2"N 75 13'50.1"E | Seashore  |
| Kerala | Payyoli                | 11 30'42.9"N 75 36'32.5"E | Seashore  |
| Kerala | Kappad                 | 11 22'54.9"N 75 43'12.5"E | Seashore  |
| Kerala | Kozhikode              | 11 15'45.8"N 75 45'56.8"E | Seashore  |
| Kerala | Beyppore               | 11 09'51.3"N 75 48'08.2"E | Seashore  |
| Kerala | Kuruvaupuzha           | 11 16'44.6"N 76 12'07.9"E | River     |
| Kerala | Chaliyar               | 11 09'39.0"N 75 48'20.4"E | River     |
| Kerala | Mahe river             | 11 42'21.5"N 75 32'02.6"E | River     |
| Kerala | Vadappyanpuzha         | 11 16'55.3"N 75 58'47.0"E | River     |
| Kerala | Akalapuzha             | 11 20'13.7"N 75 44'58.3"E | River     |
| Kerala | Cherupuzha             | 11 15'21.0"N 75 55'36.9"E | River     |
| Kerala | Korapuzha              | 11 21'12.5"N 75 44'29.0"E | River     |
| Kerala | Iruvanjippuzha         | 11 16'06.8"N 75 58'44.4"E | River     |
| Kerala | Kallai                 | 11 14'16.3"N 75 47'15.5"E | Estuary   |
| Kerala | Kadalundi              | 11 07'53.7"N 75 49'49.6"E | Mangrove  |
| Kerala | Koyilandy              | 11 26'06.2"N 75 43'44.0"E | Mangrove  |
| Kerala | Kottooly               | 11 16'29.3"N 75 47'40.3"E | Mangrove  |
| Kerala | Vallikunnu beach       | 11 05'31.2"N 75 50'17.1"E | Seashore  |
| Kerala | Parappangandi beach    | 11 03'28.0"N 75 50'52.1"E | Seashore  |
| Kerala | Kettungal beach        | 11 01'15.6"N 75 51'23.6"E | Seashore  |
| Kerala | Tanur beach            | 10 58'58.6"N 75 51'54.4"E | Seashore  |
| Kerala | Unniyal beach          | 10 55'05.5"N 75 52'56.6"E | Seashore  |
| Kerala | Vakkal beach           | 10 52'44.2"N 75 53'25.7"E | Seashore  |
| Kerala | Azheekkal beach        | 10 53'09.4"N 75 53'20.0"E | Seashore  |
| Kerala | Padinjurekkara beach   | 10 47'42.8"N 75 54'32.9"E | Seashore  |
| Kerala | Ponnani beach          | 10 47'06.8"N 75 54'44.8"E | Seashore  |
| Kerala | Kappirikkad beach      | 10 41'20.7"N 75 57'19.7"E | Seashore  |
| Kerala | Kadalundi azhimukkam   | 11 07'23.8"N 75 49'32.7"E | Estuary   |
| Kerala | Ottumparam             | 11 01'11.8"N 75 51'24.7"E | Estuary   |
| Kerala | Padinjurekkara         | 10 47'14.0"N 75 54'34.4"E | Estuary   |
| Kerala | Ponnani river          | 10 48'48.1"N 75 54'52.4"E | River     |
| Kerala | Chaliyar               | 11 15'51.0"N 75 58'56.7"E | River     |
| Kerala | Kadalundi              | 11 08'19.1"N 75 50'30.0"E | River     |
| Kerala | Tirur                  | 10 47'51.2"N 75 54'48.2"E | River     |
| Kerala | Bharathapuzha          | 10 50'21.3"N 76 05'11.0"E | River     |
| Kerala | Beeyam kayal           | 10 44'38.2"N 75 56'16.9"E | Lake      |
| Kerala | Periyambalam beach     | 10 40'49.2"N 75 57'33.6"E | Seashore  |
| Kerala | Mannalamkunnu beach    | 10 39'29.9"N 75 58'11.8"E | Seashore  |
| Kerala | Vaikkam nagar beach    | 10 38'56.4"N 75 58'26.9"E | Seashore  |
| Kerala | Chavakkad              | 10 34'19.5"N 76 00'26.8"E | Seashore  |
| Kerala | Kadappuram             | 10 32'42.9"N 76 01'14.1"E | Seashore  |
| Kerala | Chettuva               | 10 30'20.2"N 76 02'26.6"E | Seashore  |
| Kerala | Palapad beach          | 10 23'46.9"N 76 05'28.6"E | Seashore  |
| Kerala | Palappetty beach       | 10 21'41.2"N 76 06'20.8"E | Seashore  |
| Kerala | Puthiya beach          | 10 13'28.7"N 76 08'55.0"E | Seashore  |
| Kerala | Munakkal beach         | 10 10'49.9"N 76 09'44.8"E | Seashore  |
| Kerala | Puthuponnani           | 10 44'50.1"N 75 56'06.9"E | River     |
| Kerala | Karuvannur river       | 10 31'11.1"N 76 02'21.9"E | River     |
| Kerala | Periyar river          | 10 11'02.1"N 76 10'20.7"E | River     |
| Kerala | Cheetuva river         | 10 30'40.2"N 76 02'23.3"E | River     |
| Kerala | Cheetuva lake          | 10 33'03.6"N 76 02'56.2"E | Lake      |
| Kerala | Chettuva               | 10 30'34.4"N 76 02'10.7"E | Estuary   |
| Kerala | Azheekkodu             | 10 10'38.6"N 76 09'43.2"E | Estuary   |
| Kerala | Puthuponnani           | 10 43'58.3"N 75 56'06.4"E | Estuary   |
| Kerala | Cheral beach           | 10 08'22.3"N 76 10'44.0"E | Seashore  |
| Kerala | Puthuvype beach        | 10 00'38.9"N 76 12'56.8"E | Seashore  |
| Kerala | Kuzhupilly beach       | 10 06'34.7"N 76 11'14.7"E | Seashore  |
| Kerala | Fort kochi beach       | 9 57'49.2"N 76 14'15.3"E  | Seashore  |
| Kerala | Njarackal arattuvaazhi | 10 02'12.2"N 76 12'29.1"E | Seashore  |
| Kerala | Mahatma gandhi beach   | 9 58'00.9"N 76 14'23.2"E  | Seashore  |
| Kerala | Puthenthode beach      | 9 52'10.4"N 76 15'46.7"E  | Seashore  |
| Kerala | Veeranpuzha beach      | 10 04'12.3"N 76 14'24.4"E | Seashore  |
| Kerala | Aluva                  | 10 06'46.3"N 76 21'37.6"E | River     |
| Kerala | Kaniyampuzha           | 9 57'40.9"N 76 19'33.7"E  | River     |
| Kerala | Chambakkara river      | 9 57'12.9"N 76 18'53.8"E  | River     |

| State       | Location                   | Latitude Longitude        | Biosystem |
|-------------|----------------------------|---------------------------|-----------|
| Kerala      | Mattachery                 | 9 58'04.6"N 76 15'09.0"E  | Estuary   |
| Kerala      | Munakkal                   | 10 10'42.9"N 76 09'44.9"E | Estuary   |
| Kerala      | Vembanad lake              | 9 58'29.1"N 76 16'41.8"E  | Lake      |
| Kerala      | Pithuvypin                 | 9 59'51.9"N 76 13'38.3"E  | Mangrove  |
| Kerala      | Mangalvanam bird sanctuary | 9 59'16.3"N 76 16'22.5"E  | Mangrove  |
| Kerala      | Kundannur                  | 9 56'27.0"N 76 18'42.4"E  | Mangrove  |
| Kerala      | Mararikulam beach          | 9 36'02.6"N 76 17'53.3"E  | Seashore  |
| Kerala      | Marari beach               | 9 36'02.7"N 76 17'53.7"E  | Seashore  |
| Kerala      | Alappuzha beach            | 9 29'37.2"N 76 19'00.9"E  | Seashore  |
| Kerala      | Andhakaranazhi beach       | 9 44'54.8"N 76 17'02.7"E  | Seashore  |
| Kerala      | Thottappally beach         | 9 18'35.9"N 76 22'57.4"E  | Seashore  |
| Kerala      | Pathiramanal beach         | 9 31'41.3"N 76 18'36.8"E  | Seashore  |
| Kerala      | Arthunkal beach            | 9 43'03.8"N 76 17'15.0"E  | Seashore  |
| Kerala      | Marai beach                | 9 35'20.9"N 76 17'59.3"E  | Seashore  |
| Kerala      | Azhikkal                   | 11 56'28.5"N 75 17'52.0"E | Seashore  |
| Kerala      | Paravoor                   | 9 26'56.8"N 76 19'44.2"E  | Seashore  |
| Kerala      | Valanjavazhy               | 9 23'46.6"N 76 20'45.7"E  | Seashore  |
| Kerala      | Kayamkulam                 | 9 11'23.8"N 76 26'40.0"E  | Lake      |
| Kerala      | Pulinkunnu river           | 9 26'59.0"N 76 26'27.7"E  | River     |
| Kerala      | Pambayar beach             | 9 22'49.8"N 76 36'40.4"E  | River     |
| Kerala      | Alappuzha river            | 9 30'44.1"N 76 24'26.4"E  | River     |
| Kerala      | Achankovil                 | 9 19'01.7"N 76 27'03.9"E  | River     |
| Kerala      | Kayamkulam                 | 9 09'49.8"N 76 27'39.4"E  | Lake      |
| Kerala      | Punnamada                  | 9 30'15.7"N 76 21'29.1"E  | Lake      |
| Kerala      | Vembanad lake              | 9 36'59.9"N 76 22'13.1"E  | Lake      |
| Kerala      | Kandalloor                 | 9 10'26.4"N 76 27'46.7"E  | Mangrove  |
| Kerala      | Thottappally estuary       | 9 18'39.1"N 76 22'56.8"E  | Estuary   |
| Kerala      | Kollam beach               | 8 52'34.3"N 76 35'17.2"E  | Seashore  |
| Kerala      | Thirumullavaram beach      | 8 53'42.0"N 76 33'13.0"E  | Seashore  |
| Kerala      | Thangassery beach          | 8 52'53.7"N 76 34'09.4"E  | Seashore  |
| Kerala      | Eravipuram beach           | 8 51'22.1"N 76 36'50.1"E  | Seashore  |
| Kerala      | Mayyanad beach             | 8 49'23.7"N 76 38'30.1"E  | Seashore  |
| Kerala      | Secret beach               | 8 53'43.6"N 76 33'11.8"E  | Seashore  |
| Kerala      | Eravipuram beach           | 8 51'21.7"N 76 36'50.2"E  | Seashore  |
| Kerala      | Chavara beach              | 8 58'21.5"N 76 31'37.4"E  | Seashore  |
| Kerala      | Paravoor                   | 8 47'31.5"N 76 39'55.5"E  | Seashore  |
| Kerala      | Azheekkal                  | 9 07'58.0"N 76 27'45.9"E  | Seashore  |
| Kerala      | Mundakkal                  | 8 52'02.8"N 76 36'03.5"E  | Seashore  |
| Kerala      | Thottap                    | 9 05'23.8"N 76 29'05.5"E  | Seashore  |
| Kerala      | Needukara                  | 8 57'35.7"N 76 31'51.6"E  | Seashore  |
| Kerala      | Ozhukathoda beach          | 8 54'16.7"N 76 32'48.0"E  | Seashore  |
| Kerala      | Varkala beach              | 8 44'08.7"N 76 42'11.8"E  | Seashore  |
| Kerala      | Ithikkara river            | 8 51'07.1"N 76 41'17.0"E  | River     |
| Kerala      | Kallada river              | 9 04'55.0"N 76 44'58.8"E  | River     |
| Kerala      | Pallikkal river            | 9 02'14.1"N 76 32'19.4"E  | River     |
| Kerala      | Kureepuzha                 | 8 55'16.8"N 76 33'59.0"E  | River     |
| Kerala      | Ashtamudi lake             | 8 57'58.8"N 76 35'46.4"E  | Lake      |
| Kerala      | Kattaka kayal              | 8 55'32.7"N 76 32'37.4"E  | Lake      |
| Kerala      | Paravur lake               | 8 49'60.0"N 76 39'27.2"E  | Lake      |
| Kerala      | Sasthamcotta lake          | 9 02'05.0"N 76 37'29.3"E  | Lake      |
| Kerala      | Adventure park asramam     | 8 53'43.2"N 76 35'08.8"E  | Mangrove  |
| Kerala      | Munrothuruth islands       | 8 59'05.2"N 76 36'56.4"E  | Mangrove  |
| Kerala      | Kumbalam                   | 8 59'40.4"N 76 39'23.4"E  | Mangrove  |
| Kerala      | Mayyanad                   | 8 49'14"N 76 38'41"E      | Mangrove  |
| Kerala      | Paravur estuary            | 8 48'44.3"N 76 38'54.5"E  | Estuary   |
| Kerala      | Shanghumugham beach        | 8 28'42.8"N 76 54'42.6"E  | Seashore  |
| Kerala      | Puthenthope                | 8 34'19.8"N 76 50'08.4"E  | Seashore  |
| Kerala      | Veli beach                 | 8 30'44.6"N 76 53'03.1"E  | Seashore  |
| Kerala      | Kovalam beach              | 8 23'20.2"N 76 58'33.6"E  | Seashore  |
| Kerala      | Vizhinjam                  | 8 22'35.8"N 76 59'41.2"E  | Seashore  |
| Kerala      | Chowara beach              | 8 21'22.4"N 77 00'41.3"E  | Seashore  |
| Kerala      | Poovar beach               | 8 18'36.0"N 77 04'25.7"E  | Seashore  |
| Kerala      | Nellikunnu beach           | 8 36'51.2"N 76 48'02.8"E  | Seashore  |
| Kerala      | Varkala beach              | 8 44'08.8"N 76 42'11.5"E  | Seashore  |
| Kerala      | Anjuthengu                 | 8 39'46.1"N 76 45'46.7"E  | Seashore  |
| Kerala      | Palliuthra                 | 8 32'42.4"N 76 51'25.9"E  | Seashore  |
| Kerala      | Valiathura beach           | 8 27'51.2"N 76 55'28.3"E  | Seashore  |
| Kerala      | Parvati puthan river       | 8 26'41.4"N 76 56'55.2"E  | River     |
| Kerala      | Neyyar                     | 8 19'06.7"N 77 04'33.4"E  | River     |
| Kerala      | Karamana river             | 8 27'17.6"N 76 57'49.0"E  | River     |
| Kerala      | Vamanapuram river          | 8 42'04.1"N 76 55'56.9"E  | River     |
| Kerala      | Ithikkara river            | 8 51'15.5"N 76 41'31.9"E  | River     |
| Kerala      | Veli lake                  | 8 30'36.9"N 76 53'20.0"E  | Lake      |
| Kerala      | Aakulam lake               | 8 31'15.3"N 76 54'01.1"E  | Lake      |
| Kerala      | Vellayani lake             | 8 26'02.3"N 76 59'41.2"E  | Lake      |
| Kerala      | Vavvammoola lake           | 8 24'34.1"N 76 59'36.4"E  | Lake      |
| Kerala      | Poovar                     | 8 18'37.7"N 77 05'11.2"E  | Mangrove  |
| Kerala      | Poovar estuary             | 8 18'32.6"N 77 04'36.4"E  | Estuary   |
| Lakshadweep | Agatti island              | 10 51'31.6"N 72 11'36.5"E | Island    |
| Lakshadweep | Agatti island              | 10 51'31.6"N 72 11'36.5"E | Island    |
| Lakshadweep | Agatti island              | 10 51'23.0"N 72 11'43.3"E | Island    |
| Lakshadweep | Chetlat island             | 11 41'21.2"N 72 42'51.2"E | Island    |
| Lakshadweep | Kiltān island              | 11 28'59.3"N 73 00'13.3"E | Island    |
| Lakshadweep | Kiltān island              | 11 28'44.8"N 73 00'16.5"E | Island    |
| Lakshadweep | Kadmat island              | 11 12'50.0"N 72 46'33.8"E | Island    |
| Lakshadweep | Amini island 1             | 11 06'48.8"N 72 43'14.9"E | Island    |
| Lakshadweep | Androth island             | 11 06'49.3"N 72 43'05.5"E | Island    |
| Lakshadweep | Kavaratti island           | 10 33'17.3"N 72 38'00.9"E | Island    |
| Lakshadweep | Kavaratti island           | 10 33'29.5"N 72 38'33.2"E | Island    |
| Lakshadweep | Kalpeni island             | 10 03'57.0"N 73 38'17.0"E | Island    |
| Lakshadweep | Minicoy island             | 8 16'26.4"N 73 02'23.9"E  | Island    |
| Lakshadweep | Minicoy island             | 8 16'36.7"N 73 02'51.0"E  | Island    |
| Lakshadweep | Bangaram island            | 10 56'31.6"N 72 17'19.6"E | Island    |
| Goa         | Anjuna beach, goa          | 15 34'24.4"N 73 44'27.1"E | Seshore   |
| Goa         | Anjuna beach, goa          | 15 34'24.9"N 73 44'26.8"E | Seshore   |
| Goa         | Baga beach                 | 15 33'18.9"N 73 45'04.9"E | Seshore   |
| Goa         | Baga beach                 | 15 33'18.1"N 73 45'04.9"E | Seshore   |
| Goa         | Dona paula beach           | 15 27'17.4"N 73 48'16.0"E | Seshore   |
| Goa         | Dona paula beach           | 15 27'17.2"N 73 48'15.1"E | Seshore   |
| Goa         | Covla beach                | 15 16'50.0"N 73 54'42.3"E | Seshore   |
| Goa         | Covla beach                | 15 16'48.3"N 73 54'42.7"E | Seshore   |
| Goa         | Covla beach                | 15 16'48.3"N 73 54'42.7"E | Seshore   |
| Goa         | Covla beach                | 15 16'33.9"N 73 54'47.6"E | Seshore   |

| State       | Location               | Latitude Longitude        | Biosystem |
|-------------|------------------------|---------------------------|-----------|
| Goa         | Morber beach           | 15 09'26.6"N 73 56'41.7"E | Seshore   |
| Goa         | Morber beach           | 15 09'21.5"N 73 56'41.2"E | Seshore   |
| Goa         | Paloelium beach        | 15 00'35.9"N 74 01'23.7"E | Seshore   |
| Goa         | Paloelium beach        | 15 00'38.4"N 74 01'19.7"E | Seshore   |
| Goa         | Pollem beach           | 14 54'30.0"N 74 04'54.7"E | Seshore   |
| Goa         | Pollem beach           | 14.908269, 74.081926      | Seshore   |
| Goa         | Pollem beach           | 14.908090, 74.082100      | Seshore   |
| Goa         | Varca beach, fatrade   | 15 13'16.4"N 73 55'44.0"E | Seshore   |
| Goa         | Varca beach, fatrade   | 15 13'13.1"N 73 55'43.9"E | Seshore   |
| Goa         | Carmona beach, fatrade | 15 12'03.7"N 73 56'01.9"E | Seshore   |
| Goa         | Chapora river          | 15 37'23.7"N 73 44'25.5"E | River     |
| Goa         | Mandovi river          | 15 30'24.5"N 73 54'24.9"E | River     |
| Goa         | Mandovi river          | 15 30'17.1"N 73 53'24.5"E | River     |
| Goa         | Mapusa river           | 15 31'15.5"N 73 50'58.9"E | River     |
| Goa         | Mapusa river           | 15 31'02.2"N 73 50'51.9"E | River     |
| Goa         | Sal river              | 15 10'56.9"N 73 57'48.5"E | River     |
| Goa         | Terekhol river         | 15 49'12.0"N 73 53'15.2"E | River     |
| Goa         | Zuari river            | 15 24'15.2"N 73 55'24.0"E | River     |
| Goa         | Zuari river            | 15 24'12.1"N 73 56'01.2"E | River     |
| Goa         | Mandovi                | 15 30'19.2"N 73 53'20.3"E | Mangrove  |
| Goa         | Zuari rivers           | 15 24'09.0"N 73 55'48.3"E | Mangrove  |
| Karnataka   | Malpe beach            | 13 21'24.0"N 74 41'53.4"E | Seashore  |
| Karnataka   | Tagore beach           | 14 48'38.7"N 74 07'31.8"E | Seashore  |
| Karnataka   | Devbagh beach          | 14 50'53.1"N 74 06'42.3"E | Seashore  |
| Karnataka   | Eco beach              | 14 15'38.5"N 74 25'58.1"E | Seashore  |
| Karnataka   | Gokarna beach          | 14 32'36.3"N 74 18'51.3"E | Seashore  |
| Karnataka   | Karwar beach           | 14 49'53.8"N 74 07'28.7"E | Seashore  |
| Karnataka   | Kaup beach             | 13 13'23.8"N 74 44'26.2"E | Seashore  |
| Karnataka   | Kudle beach, gokarna   | 14 31'55.3"N 74 18'44.6"E | Seashore  |
| Karnataka   | Kumta                  | 14 25'08.9"N 74 23'24.0"E | Seashore  |
| Karnataka   | Kundapura beach        | 13 38'12.2"N 74 40'03.2"E | Seashore  |
| Karnataka   | Malpe beach            | 13 21'24.3"N 74 41'51.6"E | Seashore  |
| Karnataka   | Maravanthe beach       | 13 42'17.9"N 74 38'33.0"E | Seashore  |
| Karnataka   | Maravanthe beach       | 13 42'35.6"N 74 38'30.1"E | Seashore  |
| Karnataka   | Murudeshwar beach      | 14 05'41.8"N 74 29'03.0"E | Seashore  |
| Karnataka   | Murudeshwar beach      | 14 05'43.6"N 74 29'08.6"E | Seashore  |
| Karnataka   | Om beach               | 14 31'07.4"N 74 17'55.2"E | Seashore  |
| Karnataka   | Om beach, gokarna      | 14 32'21.8"N 74 18'41.7"E | Seashore  |
| Karnataka   | Panambur beach         | 12 56'10.6"N 74 48'16.4"E | Seashore  |
| Karnataka   | Panambur beach         | 13 1'09.3"N 74 19'22.7"E  | Seashore  |
| Karnataka   | Tannirbhavi beach      | 12 53'57.0"N 74 48'43.3"E | Seashore  |
| Karnataka   | Surathkal beach        | 13 00'34.7"N 74 47'21.8"E | Seashore  |
| Karnataka   | Ullal beach            | 12 48'27.3"N 74 50'33.7"E | Seashore  |
| Karnataka   | Kodi beach             | 13 36'06.6"N 74 40'22.7"E | Seashore  |
| Karnataka   | Kali river             | 14 52'23.0"N 74 11'47.5"E | River     |
| Karnataka   | River gangavali        | 14 36'24.9"N 74 20'03.4"E | River     |
| Karnataka   | Aghanasani             | 14 31'18.5"N 74 22'35.1"E | River     |
| Karnataka   | Badagani               | 14 18'43.5"N 74 25'17.7"E | River     |
| Karnataka   | Sharavati river        | 14 15'36.0"N 74 27'37.2"E | River     |
| Karnataka   | Venkatapur river       | 14 01'40.0"N 74 30'28.5"E | River     |
| Karnataka   | Pallinadi river        | 14 01'43.2"N 74 31'06.3"E | River     |
| Karnataka   | Chowtani river         | 13 58'03.7"N 74 32'10.1"E | River     |
| Karnataka   | Badindur river         | 13 51'20.7"N 74 36'49.9"E | River     |
| Karnataka   | Yadramavu river        | 13 48'13.0"N 74 37'29.0"E | River     |
| Karnataka   | Netravati river        | 12 50'34.0"N 74 50'37.2"E | River     |
| Karnataka   | Honnavar               | 14 16'38.7"N 74 26'27.6"E | Estuary   |
| Karnataka   | Gangoli estuary        | 13 37'54.3"N 74 40'00.2"E | Estuary   |
| Karnataka   | Nakhuda                | 14 01'35.0"N 74 30'05.9"E | Estuary   |
| Karnataka   | Adam kudru             | 12 50'04.7"N 74 51'29.5"E | Mangrove  |
| Karnataka   | Udupi                  | 13 05'59.5"N 74 47'42.3"E | Mangrove  |
| Karnataka   | Mulki                  | 13 03'58.3"N 74 46'54.9"E | Mangrove  |
| Maharashtra | Aare ware beach        | 17 04'38.0"N 73 17'22.9"E | Seshore   |
| Maharashtra | Alibaug                | 18 38'26.6"N 72 52'12.4"E | Seshore   |
| Maharashtra | Anjarle beach          | 18 38'28.1"N 72 52'10.6"E | Seshore   |
| Maharashtra | Chowpatty beach        | 18 57'17.2"N 72 48'33.3"E | Seshore   |
| Maharashtra | Dana pani beach        | 19 10'10.5"N 72 44'18.1"E | Seshore   |
| Maharashtra | Devgad beach           | 16 22'37.5"N 73 22'14.4"E | Seshore   |
| Maharashtra | Diveagar beach         | 18 11'32.4"N 72 58'41.2"E | Seshore   |
| Maharashtra | Ganeshgule beach       | 16 52'00.5"N 73 17'37.4"E | Seshore   |
| Maharashtra | Ganpatipule            | 17 08'54.0"N 73 15'51.6"E | Seshore   |
| Maharashtra | Guhagar beach          | 17 29'20.3"N 73 11'04.9"E | Seshore   |
| Maharashtra | Harihreshwar beach     | 18 00'13.1"N 73 01'01.8"E | Seshore   |
| Maharashtra | Hedvi ganesh           | 17 28'09.6"N 73 11'36.0"E | Seshore   |
| Maharashtra | Juhu beach             | 19 05'50.9"N 72 49'35.2"E | Seshore   |
| Maharashtra | Kashid beach           | 18 26'48.1"N 72 54'09.2"E | Seshore   |
| Maharashtra | Kelshi beach           | 17 55'10.4"N 73 03'14.5"E | Seshore   |
| Maharashtra | Kihim beach            | 18 43'22.7"N 72 51'49.7"E | Seshore   |
| Maharashtra | Kondivli beach         | 18 06'06.5"N 72 59'16.1"E | Seshore   |
| Maharashtra | Korlai fort            | 18 32'11.2"N 72 54'33.0"E | Seshore   |
| Maharashtra | Mandwa beach           | 18 48'11.4"N 72 52'41.7"E | Seshore   |
| Maharashtra | Murud beach            | 18 19'46.6"N 72 57'15.6"E | Seshore   |
| Maharashtra | Ratnagiri              | 16 59'23.7"N 73 17'09.8"E | Seshore   |
| Maharashtra | Revdanda fort          | 18 32'48.6"N 72 55'28.5"E | Seshore   |
| Maharashtra | Shrivardhan beach      | 18 02'30.2"N 73 00'39.4"E | Seshore   |
| Maharashtra | Velas beach            | 17 57'42.5"N 73 01'43.5"E | Seshore   |
| Maharashtra | Velneshwar             | 17 22'51.4"N 73 12'31.1"E | Seshore   |
| Maharashtra | Bhudal beach           | 17 24'25.1"N 73 10'27.7"E | Seshore   |
| Maharashtra | Wayari bhutnath beach  | 16 02'34.1"N 73 28'40.1"E | Seshore   |
| Maharashtra | Wayari beach           | 16 02'19.2"N 73 28'53.1"E | Seshore   |
| Maharashtra | Tarkarli beach         | 16 00'49.8"N 73 29'23.4"E | Seshore   |
| Maharashtra | Mumbai fort            | 18 55'55.1"N 72 50'23.9"E | Seshore   |
| Maharashtra | Kundalika river        | 18 26'23.1"N 73 07'38.5"E | River     |
| Maharashtra | Savtri river           | 17 59'13.2"N 73 07'21.8"E | River     |
| Maharashtra | Vashishti              | 17 59'13.2"N 73 07'21.8"E | River     |
| Maharashtra | Mithi river            | 19 03'26.4"N 72 52'04.3"E | River     |
| Maharashtra | Vaitama river          | 19 33'54.2"N 72 52'41.9"E | River     |
| Maharashtra | Banganga-1             | 19 48'11.8"N 72 41'44.6"E | River     |
| Maharashtra | Vihar lake             | 19 09'12.1"N 72 54'02.5"E | Lake      |
| Maharashtra | Tansa                  | 19 34'16.3"N 73 16'32.6"E | Lake      |
| Maharashtra | Powai lake             | 19 07'28.3"N 72 53'51.5"E | Lake      |
| Maharashtra | Virar                  | 19 29'33.7"N 72 46'59.0"E | Estuary   |
| Maharashtra | Ratnagiri              | 17 34'37.5"N 73 10'06.0"E | Estuary   |
| Maharashtra | Vijaydurg              | 16 33'37.7"N 73 20'04.2"E | Estuary   |

Script: The R script for checking the presence of required gene(s)

```
library("rjson")
library("httr")
library("htmltools")
library("svMisc")
library("RMySQL")
library(DBI)
library(pool)
library(tidyverse)

#get the total number of WGS
port_no <- 3306
pool <- dbPool(drv = RMySQL::MySQL(), dbname = "eztaxon_db", host = "localhost", username = "root", password = "", port = port_no, unix.sock = "/var/run/mysql/mysql.sock")
total_wgs_bac <- 22615 #dbGetQuery(pool, "select count(distinct puid) from eztaxon_wgs_bulk")
total_wgs_arc <- 925 #dbGetQuery(pool, "select count(distinct puid) from eztaxon_wgs_bulk_arc")

#open the raw file with cruF genes (example)
path <- dirname(rstudioapi::getSourceEditorContext()$path)
df = read.delim(paste0(path, "/Selected_genes/Bac_CruF.csv"), header = FALSE, stringsAsFactors = FALSE, quote = "", sep = ",")
colnames(df)=c("id","puid","taxon_name","ncbi_name","name","feature_name","feature_key","feature_index","gene","ref_feature_name","contig_index","contig_acc","begin","end","iscomp","title","color","pseudo_chromosome","location","product","note",
unction_qaz","seed_figfam_id","seed_function","kegg_id","kegg_function","eggnog_id","eggnog_function","go_id","ec_number","db_xref","dna","translation","added_on" )

#extract alll unique species
df_unique <- df %>% distinct(ncbi_name, .keep_all = TRUE)

#filter only halobacteria
halobacteria_puid <- dbGetQuery(pool, "select puid from taxonomy_arc WHERE Calssification LIKE '%;halobacteria;%'")

#extract halobacteria species
df_selected <- df_unique[df_unique$puid %in% c(halobacteria_puid)$puid,]

stat_total_gene <- nrow(df)
stat_unique_strains <- nrow(df_unique)
stat_unique_halobacteria_class_strains <- nrow(df_selected)

write.table( paste0("Bac_CruF", "\nTotal Gene: ", stat_total_gene, "\nUnique Strains: ", stat_unique_strains),"clipboard-16384",sep="\t", row.names = FALSE)

# Bac_CruF
# Total Gene: 397
# Unique Strains: 382
```
